# Supplementary material for: Genetic Variability of the Monkeypox Virus Clade IIb B.1
Source: MDPI journal article supplement (doi:10.3390/jcm11216388), 2022-10-28
Supplement: s1 [file s1]

We gratefully acknowledge the following Authors from the Originating laboratories responsible for obtaining the specimens, as well as the Submitting laboratories where the genome data were generated and shared via GISAID, on which this research is based.

All Submitters of data may be contacted directly via [www.gisaid.org](http://www.gisaid.org)

Authors are sorted alphabetically.

| Accession ID                                                                                                                                                                                                                                                                                                                       | Originating Laboratory                                                                                                                        | Submitting Laboratory                                                                                                                         | Authors                                                                                                                                                                                                                                                                                                                                                          |
|------------------------------------------------------------------------------------------------------------------------------------------------------------------------------------------------------------------------------------------------------------------------------------------------------------------------------------|-----------------------------------------------------------------------------------------------------------------------------------------------|-----------------------------------------------------------------------------------------------------------------------------------------------|------------------------------------------------------------------------------------------------------------------------------------------------------------------------------------------------------------------------------------------------------------------------------------------------------------------------------------------------------------------|
| EPI_ISL_13052263                                                                                                                                                                                                                                                                                                                   | Microbiol Genomics and Bioinformatics, Bundeswehr Institute of Microbiology                                                                   | Microbiol Genomics and Bioinformatics, Bundeswehr Institute of Microbiology                                                                   | Antwerpen,M.H., Lang,D., Zange,S., Walter,M.C. and Woelfel,R.                                                                                                                                                                                                                                                                                                    |
| EPI_ISL_13052264, EPI_ISL_13052265, EPI_ISL_13052266, EPI_ISL_13052267, EPI_ISL_13052268, EPI_ISL_13052269, EPI_ISL_13052270, EPI_ISL_13052271, EPI_ISL_13052272, EPI_ISL_13052273                                                                                                                                                 | Instituto Nacional de Saude Doutor Ricardo Jorge (INSA)                                                                                       | Instituto Nacional de Saude Doutor Ricardo Jorge (INSA)                                                                                       | Joana Isidro, Vítor Borges, Miguel Pinto, Daniel Sobral, João Dourado Santos, Alexandra Nunes, Verónica Mixão, Rita Ferreira, Daniela Santos, Sílvia Duarte, Luis Vieira, Maria José Borrego, Sofia Nuncio, Isabel Lopes de Carvalho, Ana Pelerito, Rita Cordeiro, João Paulo Gomes                                                                              |
| EPI_ISL_13052274                                                                                                                                                                                                                                                                                                                   | Laboratory of Virology, University Hospitals of Geneva                                                                                        | Laboratory of Virology, University Hospitals of Geneva                                                                                        | Laubscher,F., Chudzinski,V., Schibler,M., Kaiser,L. and Renzoni,A.                                                                                                                                                                                                                                                                                               |
| EPI_ISL_13052282                                                                                                                                                                                                                                                                                                                   | Microbiology, Immunology and Transplantation, KU Leuven, Rega Institute                                                                       | Microbiology, Immunology and Transplantation, KU Leuven, Rega Institute                                                                       | Vanmechelen,B., Wawina-Bokalanga,T., Logist,A.-S., Sinnesael,R., Ysebaert,L., Verlinden,J., Bloemen,M. and Maes,P.                                                                                                                                                                                                                                               |
| EPI_ISL_13052283                                                                                                                                                                                                                                                                                                                   | Microbiology, Immunology and Transplantation, KU Leuven, Rega Institute                                                                       | Microbiology, Immunology and Transplantation, KU Leuven, Rega Institute                                                                       | Wawina-Bokalanga,T., Vanmechelen,B., Logist,A.-S., Sinnesael,R., Ysebaert,L., Verlinden,J., Bloemen,M. and Maes,P.                                                                                                                                                                                                                                               |
| EPI_ISL_13052284                                                                                                                                                                                                                                                                                                                   | Microbiology, Hospital Universitari Germans Trias i Pujol                                                                                     | Microbiology, Hospital Universitari Germans Trias i Pujol                                                                                     | Martinez-Puchol,S., Coello,A., Bordoy,A.E., Soler,L., Panisello,D., Gonzalez-Gomez,S., Clara,G., Paris de Leon,A., Not,A., Hernandez,A., Bofill-Mas,S., Saludes,V., Blanco,I., Martro,E. and Cardona,P.-J.                                                                                                                                                       |
| EPI_ISL_13052285                                                                                                                                                                                                                                                                                                                   | Laboratory of Virology, University Hospitals of Geneva                                                                                        | Laboratory of Virology, University Hospitals of Geneva                                                                                        | Laubscher,F., Schibler,M., Kaiser,L. and Renzoni,A.                                                                                                                                                                                                                                                                                                              |
| EPI_ISL_13052286                                                                                                                                                                                                                                                                                                                   | Department of Biomedical and Clinical Sciences, University of Milan                                                                           | Department of Biomedical and Clinical Sciences, University of Milan                                                                           | Lai,A., Bergna,A., Della Ventura,C., Tarkowski,M., Riva,A., Moschese,D., Rizzardini,G., Antinori,S. and Zehender,G.                                                                                                                                                                                                                                              |
| EPI_ISL_13052287                                                                                                                                                                                                                                                                                                                   | Virology, GENomique EPIdemiologique des maladies Infectieuses                                                                                 | Virology, GENomique EPIdemiologique des maladies Infectieuses                                                                                 | unknown                                                                                                                                                                                                                                                                                                                                                          |
| EPI_ISL_13052288                                                                                                                                                                                                                                                                                                                   | Department of Health, Utah Public Health Laboratory                                                                                           | Department of Health, Utah Public Health Laboratory                                                                                           | Young,E.L., Hergert,J. and Oakeson,K.F.                                                                                                                                                                                                                                                                                                                          |
| EPI_ISL_13052290                                                                                                                                                                                                                                                                                                                   | Laboratory for Diagnostics of Zoonoses and WHO Centre, Institute of Microbiology and Immunology, Faculty of Medicine, University of Ljubljana | Laboratory for Diagnostics of Zoonoses and WHO Centre, Institute of Microbiology and Immunology, Faculty of Medicine, University of Ljubljana | Zakotnik,S., Vlaj,D., Suljic,A., Zorec,T.M., Korva,M., Poljak,M. and Avsic Zupanc,T.                                                                                                                                                                                                                                                                             |
| EPI_ISL_13052291                                                                                                                                                                                                                                                                                                                   | Laboratory for Diagnostics of Zoonoses and WHO Centre, Institute of Microbiology and Immunology, Faculty of Medicine, University of Ljubljana | Laboratory for Diagnostics of Zoonoses and WHO Centre, Institute of Microbiology and Immunology, Faculty of Medicine, University of Ljubljana | Zakotnik,S., Vlaj,D., Suljic,A., Zorec,T.M., Skubic,C., Rozman,D., Korva,M., Poljak,M. and Avsic Zupanc,T.                                                                                                                                                                                                                                                       |
| EPI_ISL_13052295                                                                                                                                                                                                                                                                                                                   | SC (UCO) Igiene e Sanità Pubblica, ASUGI, Trieste                                                                                             | Genomics and Epigenomics, AREA Science Park                                                                                                   | Licastro,D., DeGasperi,M., Negri,C., Piscianz,E., Koncan,R., Dal Monego,S., Segat,L. and D'Agaro,P.                                                                                                                                                                                                                                                              |
| EPI_ISL_13056892, EPI_ISL_13056893, EPI_ISL_13056894, EPI_ISL_13056895, EPI_ISL_13056896, EPI_ISL_13056897, EPI_ISL_13056898, EPI_ISL_13056899, EPI_ISL_13056900, EPI_ISL_13056901, EPI_ISL_13056902, EPI_ISL_13056903, EPI_ISL_13056904, EPI_ISL_13056905, EPI_ISL_13056906, EPI_ISL_13056907, EPI_ISL_13056908, EPI_ISL_13056909 | see above                                                                                                                                     | see above                                                                                                                                     | see above                                                                                                                                                                                                                                                                                                                                                        |
| EPI_ISL_13056910                                                                                                                                                                                                                                                                                                                   | Biochemistry and Molecular Genetics, Israel Institute for Biological Research                                                                 | Biochemistry and Molecular Genetics, Israel Institute for Biological Research                                                                 | Israeli,O., Guedj-Dana,Y., Lazar,S., Shifman,O., Erez,N., Weiss,S., Paran,N., Israely,T., Schuster,O., Zvi,A., Beth-Din,A. and Cohen Gihon,I.                                                                                                                                                                                                                    |
| EPI_ISL_13089461                                                                                                                                                                                                                                                                                                                   | Hospital General Universitario Gregorio Marañón                                                                                               | Hospital General Universitario Gregorio Marañón                                                                                               | Sergio Buenestado Serrano, Rosalía Palomino Cabrera, Daniel Peñas Utrilla, Jorge Rodríguez-Grande, Laura Pérez-Lago, Cristina Rodríguez-Grande, Marta Herranz Martín, Julia Suárez, Pilar Catalán, Patricia Muñoz, Darío García de Viedma                                                                                                                        |
| EPI_ISL_13106454                                                                                                                                                                                                                                                                                                                   | Hospital General Universitario Gregorio Marañón                                                                                               | Hospital General Universitario Gregorio Marañón                                                                                               | Sergio Buenestado Serrano, Rosalía Palomino Cabrera, Daniel Peñas Utrilla, Jorge Rodríguez-Grande, Pedro Sola Campoy, Laura Pérez-Lago, Cristina Rodríguez-Grande, Marta Herranz Martín, Julia Suárez, Pilar Catalán, Patricia Muñoz, Darío García de Viedma                                                                                                     |
| EPI_ISL_13191438                                                                                                                                                                                                                                                                                                                   | Instituto de Infectologia Emilio Ribas                                                                                                        | Instituto Adolfo Lutz Strategic Laboratory                                                                                                    | Claudio Tavares Sacchi, Karoline Rodrigues Campos, Marlon Benedito Nascimento Santos, Alex Domingos Reis, Ariadne Ferreira Amarante, Adriano Abbud, Adriana Bugno, Walkiria Delnoro Almeida Prado, Regiane Cardoso de Paula                                                                                                                                      |
| EPI_ISL_13194516                                                                                                                                                                                                                                                                                                                   | Alberta Precision Laboratories                                                                                                                | Alberta Precision Laboratories                                                                                                                | Matthew Croxen, Ashwin Deo, Paul Dieu, Xiaoli Dong, Kara Gill, David Granger, Christina Ferrato, Vanipriyadarsini Ikkurti, Jamil Kanji, Petya Koleva, Vincent Li, Colin Lloyd, Tarah Lynch, Raymond Ma, Kanti Pabbaraju, Silas Rotich, Hilary Sergeant, Steven Shideler, Todd Skitsko, Sandy Shokopoulos, Graham Tipples, Johanna Thayer, Anita Wong             |
| EPI_ISL_13234112                                                                                                                                                                                                                                                                                                                   | Laboratório Central de Saúde Pública do Estado do Rio Grande do Sul                                                                           | Instituto Adolfo Lutz Strategic Laboratory                                                                                                    | Claudio Tavares Sacchi, Karoline Rodrigues Campos, Adriano Abbud, Adriana Bugno                                                                                                                                                                                                                                                                                  |
| EPI_ISL_13244349                                                                                                                                                                                                                                                                                                                   | Erasmus Medical Center Department of Virology                                                                                                 | Erasmus Medical Center Department of Virology                                                                                                 | Bas Oude Munnink, Marjan Boter, Babette Weller, Richard Molenkamp, Janette Rahamat-Langendoen, Reina Sikkema, Marion Koopmans                                                                                                                                                                                                                                    |
| EPI_ISL_13251120                                                                                                                                                                                                                                                                                                                   | Laboratory of Virology, INMI Lazzaro Spallanzani IRCCS                                                                                        | Laboratory of Virology, INMI Lazzaro Spallanzani IRCCS                                                                                        | Giombini,E., Gruber,C.E.M., Rueca,M., Gramigna,G., Vltá,S., Carletti,F., D'Abramo,A., Lapa,D., Puro,V., Fabeni,L., Butera,O., Colavita,F., Meschi,S., Matusali,G., Specchiarello,E., Vairo,F., Vaia,F., Garbuglia,A.R., Nicastri,E., Antinori,A., Girardi,E. and Maggi,F.                                                                                        |
| EPI_ISL_13251157                                                                                                                                                                                                                                                                                                                   | checkin Zollhaus                                                                                                                              | Institute of Medical Virology, University of Zurich                                                                                           | Verena Kufner, Gabriela Ziltener, Maryam Zaheri, Stefan Schmutz, Annette Audigé, Odette Bernasconi, Kevin Steiner, Jon Huder, Cyril Shah, Riccarda Capaul, Guido Bloernberg, Jürg Böni, Michael Huber, Alexandra Trkola                                                                                                                                          |
| EPI_ISL_13251584                                                                                                                                                                                                                                                                                                                   | Division of Infectious Diseases, University Hospital Zürich                                                                                   | Institute of Medical Virology, University of Zurich                                                                                           | Verena Kufner, Gabriela Ziltener, Maryam Zaheri, Stefan Schmutz, Annette Audigé, Odette Bernasconi, Kevin Steiner, Jon Huder, Cyril Shah, Riccarda Capaul, Guido Bloernberg, Jürg Böni, Michael Huber, Alexandra Trkola                                                                                                                                          |
| EPI_ISL_13251723                                                                                                                                                                                                                                                                                                                   | checkin Zollhaus                                                                                                                              | Institute of Medical Virology, University of Zurich                                                                                           | Verena Kufner, Gabriela Ziltener, Maryam Zaheri, Stefan Schmutz, Annette Audigé, Odette Bernasconi, Kevin Steiner, Jon Huder, Cyril Shah, Riccarda Capaul, Guido Bloernberg, Jürg Böni, Michael Huber, Alexandra Trkola                                                                                                                                          |
| EPI_ISL_13269478                                                                                                                                                                                                                                                                                                                   | Alberta Precision Laboratories                                                                                                                | Alberta Precision Laboratories                                                                                                                | Matthew Croxen, Ashwin Deo, Paul Dieu, Xiaoli Dong, Kara Gill, David Granger, Christina Ferrato, Vanipriyadarsini Ikkurti, Jamil Kanji, Petya Koleva, Vincent Li, Colin Lloyd, Tarah Lynch, Raymond Ma, Kanti Pabbaraju, Silas Rotich, Hilary Sergeant, Steven Shideler, Todd Skitsko, Sandy Shokopoulos, Graham Tipples, Johanna Thayer, Anita Wong             |
| EPI_ISL_13270980                                                                                                                                                                                                                                                                                                                   | Instituto de Infectologia Emilio Ribas                                                                                                        | Imperial College London, School of Public Health                                                                                              | Claro,I.M., de Lima,E.L., Romano,C.M., Candido,D.S., Lindoso,J.A.L., Barra,L.A.C., Borges,L.M.S., Medeiros,L.A., Tomishige,M.Y.S., Ramundo,M.S., Moutinho,T., da Silva,A.J.D., Rodrigues,C.C.M., de Azevedo,L.C.F., Villas-Boas,L.S., da Silva,C.A.M., Coletti,T.M., O'Toole,A., Quick,J., Loman,N., Rambaut,A., Faria,N.R., Figueiredo-Mello,C. and Sabino,E.C. |
| EPI_ISL_13302316                                                                                                                                                                                                                                                                                                                   | Laboratory of Clinical Microbiology, Virology and Bioemergencies. ASST-Fatebenefratelli-Sacco, L.Sacco                                        | Army Medical and Veterinary Research Center                                                                                                   | Silvia Fillo, Riccardo De Sanctis, Giovanni Faggioni, Andrea Ciammaruconi, Anna Anselmo, Vanessa Vera Fain, Simone Di Sabatino, Francesco Giordani, Antonella Fortunato, Rossella Brandi, Giulia Campoli, Marzia Cavalli, Anella Monte, Martina Lipari, Maria Di Spirito, Giorgia Grilli, Silvia Chimienti,                                                      |

|                                                                                                                                                                                                                                                                                                                                                                        |                                                                                                                                                                                        |                                                                                                                                                                                        |                                                                                                                                                                                                                                                                                    |
|------------------------------------------------------------------------------------------------------------------------------------------------------------------------------------------------------------------------------------------------------------------------------------------------------------------------------------------------------------------------|----------------------------------------------------------------------------------------------------------------------------------------------------------------------------------------|----------------------------------------------------------------------------------------------------------------------------------------------------------------------------------------|------------------------------------------------------------------------------------------------------------------------------------------------------------------------------------------------------------------------------------------------------------------------------------|
|                                                                                                                                                                                                                                                                                                                                                                        | University Hospital                                                                                                                                                                    |                                                                                                                                                                                        | Giandomenico Cerreto, Filippo Molinari, Giancarlo Petralito, Davide Miletto, Valeria Micheli, Maria Rita Gismondo, Florigio Lista                                                                                                                                                  |
| EPI_ISL_13304977                                                                                                                                                                                                                                                                                                                                                       | National Public Health Center, National Biosafety Laboratory                                                                                                                           | National Public Health Center, National Biosafety Laboratory                                                                                                                           | Judit Henczkó, Dániel Déri, Lili Jármí, Bernadett Pályi, Zoltán Kis,                                                                                                                                                                                                               |
| EPI_ISL_13308158, EPI_ISL_13308160                                                                                                                                                                                                                                                                                                                                     | IRBA Research Institute Biomédicale Des Armées                                                                                                                                         | IRBA Research Institute Biomédicale Des Armées                                                                                                                                         | Jarjaval,F., Nolent,F., Criqui,A., Chapus,C., Lamer,O., Ferraris,O. and Gorge,O.                                                                                                                                                                                                   |
| EPI_ISL_13308167                                                                                                                                                                                                                                                                                                                                                       | Laboratory for Diagnostics of Zoonoses and WHO Centre, Institute of Microbiology and Immunology, Faculty of Medicine, University of Ljubljana                                          | Laboratory for Diagnostics of Zoonoses and WHO Centre, Institute of Microbiology and Immunology, Faculty of Medicine, University of Ljubljana                                          | Zakotnik,S., Vljaj,D., Suljic,A., Zorec,T.M., Korva,M., Poljak,M. and Avsic Zupanc,T.                                                                                                                                                                                              |
| EPI_ISL_13314740                                                                                                                                                                                                                                                                                                                                                       | Laboratorio de Vigilancia em Saude de Vinhedo                                                                                                                                          | Instituto Adolfo Lutz Strategic Laboratory                                                                                                                                             | Claudio Tavares Sacchi, Karoline Rodrigues Campos, Adriano Abbud, Adriana Bugno                                                                                                                                                                                                    |
| EPI_ISL_13331598                                                                                                                                                                                                                                                                                                                                                       | Department for Virology, Molecular Biology and Genome Research, R. G. Lugar Center for Public Health Research, National Center for Disease Control and Public Health (NCDC) of Georgia | Department for Virology, Molecular Biology and Genome Research, R. G. Lugar Center for Public Health Research, National Center for Disease Control and Public Health (NCDC) of Georgia | Giorgi Tomashvili, Salome Javashvili, Meri Pantsulaila, Gvantsa Brachveli, Ana Papiiuri, Gvantsa Chanturia, Adam Kotorashvili, Maia Alkhazashvili, Khatuna Zakhashvili, Paata Innadze, Amiran Gamkrelidze.                                                                         |
| EPI_ISL_13331712                                                                                                                                                                                                                                                                                                                                                       | Laboratory of Virology, INMI Lazzaro Spallanzani IRCCS                                                                                                                                 | Laboratory of Virology, INMI Lazzaro Spallanzani IRCCS                                                                                                                                 | Rueca,M., Giombini,E., Gruber,C.E.M., Gramigna,G., Mazzotta,V., Carletti,F., Lapa,D., Pittalis,S., Puro,V., Fabeni,L., Butera,O., Colavita,F., Meschi,S., Matusali,G., Specchiarello,E., Vairo,F., Vaia,F., Nicastri,E., Antinori,A., Girardi,E. and Maggi,F.                      |
| EPI_ISL_13331713                                                                                                                                                                                                                                                                                                                                                       | Laboratory of Virology, INMI Lazzaro Spallanzani IRCCS                                                                                                                                 | Laboratory of Virology, INMI Lazzaro Spallanzani IRCCS                                                                                                                                 | Gramigna,G., Giombini,E., Gruber,C.E.M., Rueca,M., Carletti,F., Cicalini,S., Lapa,D., Puro,V., Marani,A., Fabeni,L., Butera,O., Colavita,F., Meschi,S., Matusali,G., Rivano Capparuccia,M., Specchiarello,E., Vairo,F., Vaia,F., Nicastri,E., Antinori,A., Girardi,E. and Maggi,F. |
| EPI_ISL_13331717                                                                                                                                                                                                                                                                                                                                                       | Genomics Division, Instituto Tecnológico y de Energías Renovables (ITER), Polígono Industrial de Granadilla                                                                            | Genomics Division, Instituto Tecnológico y de Energías Renovables (ITER), Polígono Industrial de Granadilla                                                                            | Alcoba-Florez,J., Munoz-Barrera,A., Cluffreda,L., Rodriguez-Perez,H., Rubio-Rodriguez,L.A., Gil-Campesino,H., Garcia-Martinez de Artola,D., Inigo-Campos,A., Diez-Gil,O., Gonzalez-Montelongo,R., Valenzuela-Fernandez,A., Valenzuela-Salazar,J.M. and Flores,C.                   |
| EPI_ISL_13338028                                                                                                                                                                                                                                                                                                                                                       | Clinical Virology Unit, Department of Clinical Sciences, Institute of Tropical Medicine of Antwerp                                                                                     | Clinical Virology Unit, Department of Clinical Sciences, Institute of Tropical Medicine of Antwerp                                                                                     | Antonio Mauro Rezende*, Tessa de Block*, Sandra Coppens, Eric Florence, Maartje van Frankenhuijsen, Stefanie Bracke, Isabel Brosius, Laurens Liesenborghs, Patrick Soentjens, Kevin Ariën, Marjan Van Esbroeck, Philippe Selhorst*, Koen Vercauteren* *equal contribution          |
| EPI_ISL_13339105                                                                                                                                                                                                                                                                                                                                                       | Microbiology Service, Hospital Universitario Clinico San Cecilio, Granada                                                                                                              | Microbiology Service, Hospital Universitario Clinico San Cecilio, Granada                                                                                                              | Chueca N, de Salazar A, Viñuela L, Fuentes A, Casimiro-Soriguer CS, Perez-Florio J, Dopazo J, Garcia F                                                                                                                                                                             |
| EPI_ISL_13342823                                                                                                                                                                                                                                                                                                                                                       | Clinical Virology Unit, Department of Clinical Sciences, Institute of Tropical Medicine of Antwerp                                                                                     | Clinical Virology Unit, Department of Clinical Sciences, Institute of Tropical Medicine of Antwerp                                                                                     | Philippe Selhorst, Antonio Mauro Rezende, Tessa de Block, Sandra Coppens, Eric Florence, Isabel Brosius, Laurens Liesenborghs, Kevin Ariën, Marjan Van Esbroeck, Chris Kenyon, Koen Vercauteren                                                                                    |
| EPI_ISL_13343634                                                                                                                                                                                                                                                                                                                                                       | Instituto de Infectologia Emilio Ribas                                                                                                                                                 | Instituto Adolfo Lutz Strategic Laboratory                                                                                                                                             | Claudio Tavares Sacchi, Karoline Rodrigues Campos, Adriano Abbud, Adriana Bugno                                                                                                                                                                                                    |
| EPI_ISL_13343697                                                                                                                                                                                                                                                                                                                                                       | Fleury Medicina Diagnóstica                                                                                                                                                            | Instituto Adolfo Lutz Strategic Laboratory                                                                                                                                             | Claudio Tavares Sacchi, Karoline Rodrigues Campos, Adriano Abbud, Adriana Bugno                                                                                                                                                                                                    |
| EPI_ISL_13343718                                                                                                                                                                                                                                                                                                                                                       | Hospital Santa Ighes                                                                                                                                                                   | Instituto Adolfo Lutz Strategic Laboratory                                                                                                                                             | Claudio Tavares Sacchi, Karoline Rodrigues Campos, Adriano Abbud, Adriana Bugno                                                                                                                                                                                                    |
| EPI_ISL_13362760, EPI_ISL_13362764                                                                                                                                                                                                                                                                                                                                     | Laboratorio di Epidemiologia Molecolare e Sanità Pubblica-Policlinico Bari                                                                                                             | Istituto Zooprofilattico Sperimentale della Puglia e della Basilicata                                                                                                                  | Parisi A, Simone D, Capozzi L, Del Sambio L, Bianco A, Chironna M, Loconsole D, Sallustio F, Galante D, Pace L, Manzulli V, Fasanella A.                                                                                                                                           |
| EPI_ISL_13363142                                                                                                                                                                                                                                                                                                                                                       | Hospital Universitari Vall d'Hebron                                                                                                                                                    | Hospital Universitari Vall d'Hebron                                                                                                                                                    | Maria Piñana, Cristina Andrés, Alejandra González-Sánchez, Damir Garcia-Cehic, Ariadna Rando, Juliana Esperalba, Maria Gema Codina, Maria Carmen Martin, Carla Castillo, Karen García, Rodrigo Vásquez, Maria Piquer, Tomás Pumarola, Josep Quer, Andrés Antón                     |
| EPI_ISL_13374487                                                                                                                                                                                                                                                                                                                                                       | National Public Health Center, National Biosafety Laboratory                                                                                                                           | National Public Health Center, National Biosafety Laboratory                                                                                                                           | Judit Henczkó, Dániel Déri, Fruzsina Petrovay, Lili Jármí, Bernadett Pályi, Eszter Balla, Zoltán Kis                                                                                                                                                                               |
| EPI_ISL_13408799, EPI_ISL_13408801, EPI_ISL_13408803                                                                                                                                                                                                                                                                                                                   | Public Health Agency of Canada, National Microbiology Laboratory                                                                                                                       | Public Health Agency of Canada, National Microbiology Laboratory                                                                                                                       | Knox,N., Hole,D., Duggan,A., Yadav,C., Haidl,E., Chapel,M., Graham,M., Domselaar,G.V., Jolly,G., Audet,J., Fernando,L., Antonation,K., Hagan,M., Griffiths,E., Leung,A., Saffronetz,D., Eshaghi,A., Gubbay,J.B., Hasso,M., Marchand-Austin,A., Olsha,R. and Patel,S.N.             |
| EPI_ISL_13408805, EPI_ISL_13408807, EPI_ISL_13408809, EPI_ISL_13408811, EPI_ISL_13408813, EPI_ISL_13408815, EPI_ISL_13408817, EPI_ISL_13408819, EPI_ISL_13408821, EPI_ISL_13408823, EPI_ISL_13408825, EPI_ISL_13408827, EPI_ISL_13408829, EPI_ISL_13408831, EPI_ISL_13408833, EPI_ISL_13408835                                                                         | Public Health Agency of Canada, National Microbiology Laboratory                                                                                                                       | Public Health Agency of Canada, National Microbiology Laboratory                                                                                                                       | ncknox                                                                                                                                                                                                                                                                             |
| EPI_ISL_13408837, EPI_ISL_13408839, EPI_ISL_13408841, EPI_ISL_13408843, EPI_ISL_13408845, EPI_ISL_13408847, EPI_ISL_13408849, EPI_ISL_13408851, EPI_ISL_13408853, EPI_ISL_13408855, EPI_ISL_13408857, EPI_ISL_13408859, EPI_ISL_13408861                                                                                                                               | Public Health Agency of Canada, National Microbiology Laboratory                                                                                                                       | Public Health Agency of Canada, National Microbiology Laboratory                                                                                                                       | Knox,N., Duggan,A., Yadav,C., Hole,D., Haidl,E., Chapel,M., Jolly,G., Domselaar,G.V., Antonation,K., Leung,A., Fernando,L., Audet,J., Hagan,M., Graham,M., Griffiths,E., Saffronetz,D., Charest,H., Levade,I. and Fafard,J.                                                        |
| EPI_ISL_13409177, EPI_ISL_13409178, EPI_ISL_13409179, EPI_ISL_13409180, EPI_ISL_13409181                                                                                                                                                                                                                                                                               | Viral Genomics and Bioinformatics, MRC University of Glasgow Centre for Virus Research                                                                                                 | Viral Genomics and Bioinformatics, MRC University of Glasgow Centre for Virus Research                                                                                                 | Filipe,A., Tong,L., Vattipally,S.B., Maclean,A., Gunson,R., Holden,M.T.G., Barr,D., Ho,A., Palmerini,M., Rambaut,A., Robertson,D.L. and Thomson,E.C.                                                                                                                               |
| EPI_ISL_13436658                                                                                                                                                                                                                                                                                                                                                       | Coordenadoria de Vigilancia em Saude - Sao Paulo                                                                                                                                       | Instituto Adolfo Lutz Strategic Laboratory                                                                                                                                             | Claudio Tavares Sacchi, Karoline Rodrigues Campos, Ariadne Ferreira Amarante, Adriano Abbud, Adriana Bugno                                                                                                                                                                         |
| EPI_ISL_13436792                                                                                                                                                                                                                                                                                                                                                       | Hospital Santa Ighes                                                                                                                                                                   | Instituto Adolfo Lutz Strategic Laboratory                                                                                                                                             | Claudio Tavares Sacchi, Karoline Rodrigues Campos, Adriano Abbud, Adriana Bugno                                                                                                                                                                                                    |
| EPI_ISL_13437056                                                                                                                                                                                                                                                                                                                                                       | Hosp. Alemao Oswaldo Cruz                                                                                                                                                              | Instituto Adolfo Lutz Strategic Laboratory                                                                                                                                             | Claudio Tavares Sacchi, Karoline Rodrigues Campos, Ariadne Ferreira Amarante, Adriano Abbud, Adriana Bugno                                                                                                                                                                         |
| EPI_ISL_13449965, EPI_ISL_13449966                                                                                                                                                                                                                                                                                                                                     | Hospital Universitario La Paz, Microbiology                                                                                                                                            | Hospital Universitario La Paz, Microbiology                                                                                                                                            | de la Hoz-Sanchez,B., Lopez-Ortiz,M., Gutierrez-Arroyo,A., Rocas-Alvarez,P., Lazaro-Peona.F., Dahdouh,E., Bloise,I., Garcia-Rodriguez,J. and Mingorance,J.                                                                                                                         |
| EPI_ISL_13459346                                                                                                                                                                                                                                                                                                                                                       | CRT-DST-AIDS                                                                                                                                                                           | Instituto Adolfo Lutz Strategic Laboratory                                                                                                                                             | Claudio Tavares Sacchi, Karoline Rodrigues Campos, Ariadne Ferreira Amarante, Adriano Abbud, Adriana Bugno                                                                                                                                                                         |
| EPI_ISL_13459347, EPI_ISL_13459482, EPI_ISL_13459483                                                                                                                                                                                                                                                                                                                   | Instituto de Infectologia Emilio Ribas                                                                                                                                                 | Instituto Adolfo Lutz Strategic Laboratory                                                                                                                                             | Claudio Tavares Sacchi, Karoline Rodrigues Campos, Ariadne Ferreira Amarante, Adriano Abbud, Adriana Bugno                                                                                                                                                                         |
| EPI_ISL_13466446, EPI_ISL_13466447, EPI_ISL_13466448, EPI_ISL_13466449, EPI_ISL_13466450, EPI_ISL_13466451, EPI_ISL_13466452, EPI_ISL_13466453, EPI_ISL_13466454, EPI_ISL_13466455, EPI_ISL_13466456, EPI_ISL_13466457, EPI_ISL_13466458, EPI_ISL_13466459, EPI_ISL_13466460, EPI_ISL_13466461, EPI_ISL_13466462, EPI_ISL_13466463, EPI_ISL_13466464, EPI_ISL_13466465 | Department of Infectious Diseases, National Institute of Health Doutor Ricardo Jorge, Portugal (INSA)                                                                                  | Department of Infectious Diseases, National Institute of Health Doutor Ricardo Jorge, Portugal (INSA)                                                                                  | Isidro,J., Borges,V., Pinto,M., Sobral,D., Santos,J., Nunes,A., Mixao,V., Ferreira,R., Santos,D., Duarte,S., Vieira,L., Borrego,M.J., Nuncio,S., Lopes de Carvalho,I., Pelerito,A., Cordeiro,R., Gomes,J.P.                                                                        |
| see above                                                                                                                                                                                                                                                                                                                                                              | Department of Infectious Diseases, National Institute of Health Doutor Ricardo Jorge, Portugal (INSA)                                                                                  | Department of Infectious Diseases, National Institute of Health Doutor Ricardo Jorge, Portugal (INSA)                                                                                  | Wokowicz Tomasz, Zacharczuk Katarzyna, Gierczyński Rafa                                                                                                                                                                                                                            |
| EPI_ISL_13472080                                                                                                                                                                                                                                                                                                                                                       | National Institute of Public Health NIH - NRI                                                                                                                                          | National Institute of Public Health NIH - NRI                                                                                                                                          | Jeremy V. Camp, Monika Redlberger-Fritz, Stephan W. Aberle                                                                                                                                                                                                                         |
| EPI_ISL_13472250                                                                                                                                                                                                                                                                                                                                                       | Medical University of Vienna Center for Virology                                                                                                                                       | Medical University of Vienna Center for Virology                                                                                                                                       | Nicola Fletcher, Gabriel Gonzalez, Luke Meredith, Kevin Purves, Michael Carr, Jonathan Dean, Brian Keogan, Brendan Crowley, Fiona Lyons, Sophie O'Reilly, Virginie Gautier, Patrick Mallon, Stephen Gordon, Jeff Connell, Cillian F De Gascun                                      |
| EPI_ISL_13483780                                                                                                                                                                                                                                                                                                                                                       | UCD National Virus Reference Laboratory, University College Dublin                                                                                                                     | UCD National Virus Reference Laboratory, University College Dublin                                                                                                                     | Paola Resende, Elisa Cavalcante Pereira, Bruna Mendonça da Silva, Jéssica Graça Macedo de Carvalho, Larissa Macedo Pinto, Victor Guimaraes, Marilda Siqueira, Renan da Silva Faustino, Marília Santini, Edson Elias da Silva on behalf of the Fiocruz Genomic Surveillance Network |
| EPI_ISL_13484458                                                                                                                                                                                                                                                                                                                                                       | Laboratorio de Enterovirus, Instituto Oswaldo Cruz, Fiocruz                                                                                                                            | Instituto Oswaldo Cruz FIOCRUZ - Laboratory of Respiratory Viruses and Measles (LVRs)                                                                                                  | Chan WY, Mtsahl PS, Grobbelaar A, Moolla N, Mohale T, Du Plessis MG, Ismail A, Weyer J                                                                                                                                                                                             |
| EPI_ISL_13498265                                                                                                                                                                                                                                                                                                                                                       | National Institute for Communicable Diseases of the National Health Laboratory Service                                                                                                 | National Institute for Communicable Diseases of the National Health Laboratory Service                                                                                                 | Bas Oude Munnink, Marjan Boter, Babette Weller, Richard Molenkamp, Janette Rahamat-Langendoen, Reina Sikkema, Marion Koopmans                                                                                                                                                      |
| EPI_ISL_13499566                                                                                                                                                                                                                                                                                                                                                       | Erasmus Medical Center Department of Virology                                                                                                                                          | Erasmus Medical Center Department of Virology                                                                                                                                          | Francesco Cerutti, Antonella Bottoni, Marisa Cazzadore, Tiziano Alice, Maria Grazia Milia, Gabriella Gregori, Elisa Burdino, Valeria Ghisetti                                                                                                                                      |
| EPI_ISL_13502582                                                                                                                                                                                                                                                                                                                                                       | Laboratory of Microbiology and Virology, Ospedale Amedeo di Savoia, ASL "Città di Torino"                                                                                              | Laboratory of Microbiology and Virology, Ospedale Amedeo di Savoia, ASL "Città di Torino"                                                                                              | Claudio Tavares Sacchi, Karoline Rodrigues Campos, Ariadne Ferreira Amarante, Adriano Abbud, Adriana Bugno                                                                                                                                                                         |
| EPI_ISL_13508393                                                                                                                                                                                                                                                                                                                                                       | Hosp. Itacolomy Butanta                                                                                                                                                                | Instituto Adolfo Lutz Strategic Laboratory                                                                                                                                             | Claudio Tavares Sacchi, Karoline Rodrigues Campos, Ariadne Ferreira Amarante, Adriano Abbud, Adriana Bugno                                                                                                                                                                         |
| EPI_ISL_13508471                                                                                                                                                                                                                                                                                                                                                       | Instituto de Infectologia Emilio Ribas                                                                                                                                                 | Instituto Adolfo Lutz Strategic Laboratory                                                                                                                                             | Claudio Tavares Sacchi, Karoline Rodrigues Campos, Ariadne Ferreira Amarante, Adriano Abbud, Adriana Bugno                                                                                                                                                                         |

|                                                                                                                                                                                                                                                                                                                                                                                                                                                                                                                                                                                                                                                                                                                                                                                                                                                                                                |                                                                                                                                |                                                                                                                                                                     |                                                                                                                                                                                                                                                                                                                                                                                                                                                                                                                                                                                                                                                                                                                                                                                                  |
|------------------------------------------------------------------------------------------------------------------------------------------------------------------------------------------------------------------------------------------------------------------------------------------------------------------------------------------------------------------------------------------------------------------------------------------------------------------------------------------------------------------------------------------------------------------------------------------------------------------------------------------------------------------------------------------------------------------------------------------------------------------------------------------------------------------------------------------------------------------------------------------------|--------------------------------------------------------------------------------------------------------------------------------|---------------------------------------------------------------------------------------------------------------------------------------------------------------------|--------------------------------------------------------------------------------------------------------------------------------------------------------------------------------------------------------------------------------------------------------------------------------------------------------------------------------------------------------------------------------------------------------------------------------------------------------------------------------------------------------------------------------------------------------------------------------------------------------------------------------------------------------------------------------------------------------------------------------------------------------------------------------------------------|
| EPI_ISL_13511312                                                                                                                                                                                                                                                                                                                                                                                                                                                                                                                                                                                                                                                                                                                                                                                                                                                                               | Laboratorio de Salud Pública de Antioquia                                                                                      | Instituto Nacional de Salud- Dirección de Investigación en Salud Pública                                                                                            | Katherine Laiton-Donato, Diego A. Álvarez-Díaz, Carlos Franco-Muñoz, Héctor A. Ruiz-Moreno, Paola Rojas-Estevez, Andres Prada, Alicia Rosales, Marcela Mercado-Reyes                                                                                                                                                                                                                                                                                                                                                                                                                                                                                                                                                                                                                             |
| EPI_ISL_13530881                                                                                                                                                                                                                                                                                                                                                                                                                                                                                                                                                                                                                                                                                                                                                                                                                                                                               | Laboratorio de Referencia Nacional de Virus Respiratorios. Centro Nacional de Salud Publica. Instituto Nacional de Salud Peru. | Laboratorio de Referencia Nacional de Virus Respiratorios. Centro Nacional de Salud Publica. Instituto Nacional de Salud Peru.                                      | Carlos Padilla Rojas, Veronica Hurtado Vela, Iris Silva Molina, Luren Sevilla Castañeda, Víctor Jimenez Vasquez, Orson Mestanza Millones, Luis Barcena Flores, Wendy Lizarraga Olivares, Alicia Nuñez Llanos, Steve Acedo Lazo, Francisco Ascue Oroscio, Kelly Izarra Rojas, Princesa Medrano Alhuay, Karla Vasquez Cajachahua, Estela Huanan Angeles, Jorge Giraldo Chavez, Lilian Huarca Balbin, Lisbet Roxana Inga Angulo, Maria Sandra Villar Saavedra, Henri Bailon Calderon, Lely Solari Zerpa, Gloria Arotinco Garayar. Equipo de vigilancia genomica del Instituto Nacional de Salud.                                                                                                                                                                                                    |
| EPI_ISL_13537922                                                                                                                                                                                                                                                                                                                                                                                                                                                                                                                                                                                                                                                                                                                                                                                                                                                                               | Instituto de Medicina Tropical de Sao Paulo (IMT-USP)                                                                          | School of Public Health, Imperial College London                                                                                                                    | Coletti,T.M., Ghilardi,F., Khan,M.J., Claro,I.M., Valenca,I.N., Faria,N.R. and Sabino,E.C.                                                                                                                                                                                                                                                                                                                                                                                                                                                                                                                                                                                                                                                                                                       |
| EPI_ISL_13537923                                                                                                                                                                                                                                                                                                                                                                                                                                                                                                                                                                                                                                                                                                                                                                                                                                                                               | Microbiology, Immunology and Transplantation, KU Leuven, Rega Institute                                                        | Microbiology, Immunology and Transplantation, KU Leuven, Rega Institute                                                                                             | Wawina-Bokalanga,T., Vanmechelen,B., Logist,A.-S., Sinnesael,R., Ysebaert,L., Bloemen,M. and Maes,P.                                                                                                                                                                                                                                                                                                                                                                                                                                                                                                                                                                                                                                                                                             |
| EPI_ISL_13537924, EPI_ISL_13537925, EPI_ISL_13537926                                                                                                                                                                                                                                                                                                                                                                                                                                                                                                                                                                                                                                                                                                                                                                                                                                           | Microbiology, Immunology and Transplantation, KU Leuven, Rega Institute                                                        | Microbiology, Immunology and Transplantation, KU Leuven, Rega Institute                                                                                             | Vanmechelen,B., Wawina-Bokalanga,T., Logist,A.-S., Sinnesael,R., Ysebaert,L., Verlinden,J., Van Holm,B., Bloemen,M. and Maes,P.                                                                                                                                                                                                                                                                                                                                                                                                                                                                                                                                                                                                                                                                  |
| EPI_ISL_13544223, EPI_ISL_13544224, EPI_ISL_13544225, EPI_ISL_13544226, EPI_ISL_13544227, EPI_ISL_13544228, EPI_ISL_13544229, EPI_ISL_13544230, EPI_ISL_13544231, EPI_ISL_13544232, EPI_ISL_13544233, EPI_ISL_13544234, EPI_ISL_13544235, EPI_ISL_13544236                                                                                                                                                                                                                                                                                                                                                                                                                                                                                                                                                                                                                                     | see above                                                                                                                      | Public Health Agency of Canada, National Microbiology Laboratory                                                                                                    | Duggan,A., Hole,D., Knox,N., Yadav,C., Haidl,E., Chapel,M., Domselaar,G.V., Jolly,G., Audet,J., Fernando,L., Antonation,K., Safronetz,D., Hagan,M., Griffiths,E., Leung,A., Graham,M., Peters,G., Go,A., Laminman,V., Kaplen,B., Eshaghi,A., Gubbay,J.B., Hasso,M., Marchand-Austin,A., Olsha,R. and Patel,S.N.                                                                                                                                                                                                                                                                                                                                                                                                                                                                                  |
| EPI_ISL_13544237, EPI_ISL_13544238, EPI_ISL_13544239, EPI_ISL_13544240, EPI_ISL_13544241, EPI_ISL_13544242, EPI_ISL_13544243, EPI_ISL_13544244, EPI_ISL_13544245, EPI_ISL_13544246, EPI_ISL_13544247, EPI_ISL_13544248, EPI_ISL_13544249, EPI_ISL_13544250, EPI_ISL_13544251, EPI_ISL_13544252, EPI_ISL_13544253, EPI_ISL_13544254, EPI_ISL_13544255, EPI_ISL_13544256, EPI_ISL_13544257, EPI_ISL_13544258, EPI_ISL_13544259, EPI_ISL_13544260, EPI_ISL_13544261, EPI_ISL_13544262, EPI_ISL_13544263, EPI_ISL_13544264, EPI_ISL_13544265, EPI_ISL_13544266, EPI_ISL_13544267                                                                                                                                                                                                                                                                                                                   | see above                                                                                                                      | Public Health Agency of Canada, National Microbiology Laboratory                                                                                                    | Duggan,A., Hole,D., Knox,N., Yadav,C., Haidl,E., Chapel,M., Domselaar,G.V., Fernando,L., Graham,M., Antonation,K., Audet,J., Hagan,M., Safronetz,D., Leung,A., Peters,G., Go,A., Laminman,V., Kaplen,B., Jolly,G., Charest,H., Levade,I. and Fafard,J.                                                                                                                                                                                                                                                                                                                                                                                                                                                                                                                                           |
| EPI_ISL_13573943                                                                                                                                                                                                                                                                                                                                                                                                                                                                                                                                                                                                                                                                                                                                                                                                                                                                               | Center for Virology, Medical University of Vienna                                                                              | Medical University of Vienna Center for Virology                                                                                                                    | Jeremy V. Camp, Monika Redlberger-Fritz, Stephan W. Aberle                                                                                                                                                                                                                                                                                                                                                                                                                                                                                                                                                                                                                                                                                                                                       |
| EPI_ISL_13584854, EPI_ISL_13586184                                                                                                                                                                                                                                                                                                                                                                                                                                                                                                                                                                                                                                                                                                                                                                                                                                                             | Institute for Virology, Philipps-University Marburg                                                                            | Institute for Virology, Philipps-University Marburg                                                                                                                 | Eickmann, M., Lier, C., Kowalski, K., Kraft, F., Becker, S.                                                                                                                                                                                                                                                                                                                                                                                                                                                                                                                                                                                                                                                                                                                                      |
| EPI_ISL_13607904                                                                                                                                                                                                                                                                                                                                                                                                                                                                                                                                                                                                                                                                                                                                                                                                                                                                               | Servicio de Infectologia, Hospital Universitario Dr. José Eleuterio Gonzalez, Universidad Autonoma de Nuevo Leon               | Centro de Investigacion e Innovacion en Virologia Medica, Departamento de Bioquimica y Medicina Molecular, Facultad de Medicina, Universidad Autonoma de Nuevo Leon | Kame A. Galan-Huerta, Manuel Paz Infanzon, Ali F. Ruiz Higareda, Laura Nuzzolo-Shihadeh, Adrian Camacho-Ortiz, Paola Bocanegra-Ibarias, Ana M. Rivas-Estilla, Daniel Zacarias-Villarreal, Luis A. Yamallel-Ortega, Maria D. Guerrero-Putz, Jorge Ocampo-Caniani                                                                                                                                                                                                                                                                                                                                                                                                                                                                                                                                  |
| EPI_ISL_13624509                                                                                                                                                                                                                                                                                                                                                                                                                                                                                                                                                                                                                                                                                                                                                                                                                                                                               | Instituto de Diagnóstico y Referencia Epidemiológicos/Jurisdicción Sanitaria Cuauhtémoc/Hospital Ángeles Roma                  | Instituto de Diagnóstico y Referencia Epidemiológicos/Instituto de Biotecnología UNAM                                                                               | Adnan Araiza-Rodríguez, Adriana Salvador-Patiño, Alejandro Sánchez-Flores, América del Pilar Mandujano-Martínez, Blanca Taboada, Carlos Eduardo Hernández-Sánchez, Carlos F. Arias, Claudia Elena Wong-Arámbula, Daniel José Regalado-Santiago, David Esaú Fragoso-Fonseca, Elizabeth Andrade-Montiel, Fabiola Garcés-Ayala, Fernando González-Domínguez, Gabriel García-Rodríguez, Gloria Vázquez-Castro, Hugo López Gatell Ramírez, Irma López-Martínez, Jerome Verleyen, Jesús Trujillo, Jorge Ochoa, José Ernesto Ramírez-González, Karel Estrada-Guerra, Lucía Hernández-Rivas, Magaly Guadalupe Landa-Flores, Maribel González-Villa, Mireya Mederos-Michel, Nancy Martínez-Velázquez, Noé Escobar-Escamilla, Oliva López, Ricardo Cortés-Alcalá, Ricardo Grande, Verónica Jiménez-Jacinto |
| EPI_ISL_13632071                                                                                                                                                                                                                                                                                                                                                                                                                                                                                                                                                                                                                                                                                                                                                                                                                                                                               | Center of Diagnostics and Vaccine Development, Centers for Disease Control, Taiwan                                             | Center of Diagnostics and Vaccine Development, Centers for Disease Control, Taiwan                                                                                  | Jih-Hui Lin, Shu-Chun Chiu, Hsin-I, Huang, Wei-Lun Huang, Wen-Bin, Fann, Pei-Yu, Hsieh, Jyh-Yuan Yang                                                                                                                                                                                                                                                                                                                                                                                                                                                                                                                                                                                                                                                                                            |
| EPI_ISL_13632288                                                                                                                                                                                                                                                                                                                                                                                                                                                                                                                                                                                                                                                                                                                                                                                                                                                                               | National Institute for Communicable Diseases of the National Health Laboratory Service                                         | National Institute for Communicable Diseases of the National Health Laboratory Service                                                                              | Chan WY, Mthshali PS, Grobbelaar A, Moolna N, Mohale T, Lowe M, Du Plessis MG, Ismail A, Weyer J                                                                                                                                                                                                                                                                                                                                                                                                                                                                                                                                                                                                                                                                                                 |
| EPI_ISL_13651348, EPI_ISL_13651349, EPI_ISL_13651350                                                                                                                                                                                                                                                                                                                                                                                                                                                                                                                                                                                                                                                                                                                                                                                                                                           | Laboratorio de Referencia Nacional de Virus Respiratorio. Centro Nacional de Salud Publica. Instituto Nacional de Salud.       | Laboratorio de Referencia Nacional de Virus Respiratorio. Centro Nacional de Salud Publica. Instituto Nacional de Salud.                                            | Carlos Padilla Rojas, Veronica Hurtado Vela, Iris Silva Molina, Luren Sevilla Castañeda, Víctor Jimenez Vasquez, Orson Mestanza Millones, Luis Barcena Flores, Wendy Lizarraga Olivares, Alicia Nuñez Llanos, Steve Acedo Lazo, Francisco Ascue Oroscio, Kelly Izarra Rojas, Princesa Medrano Alhuay, Karla Vasquez Cajachahua, Estela Huanan Angeles, Jorge Giraldo Chavez, Lilian Huarca Balbin, Lisbet Roxana Inga Angulo, Maria Sandra Villar Saavedra, Henri Bailon Calderon, Lely Solari Zerpa, Gloria Arotinco Garayar. Equipo de vigilancia genomica del Instituto Nacional de Salud.                                                                                                                                                                                                    |
| EPI_ISL_13658019, EPI_ISL_13658021                                                                                                                                                                                                                                                                                                                                                                                                                                                                                                                                                                                                                                                                                                                                                                                                                                                             | Erasmus Medical Center Department of Virology                                                                                  | Erasmus Medical Center Department of Virology                                                                                                                       | Bas Oude Munnink, Marjan Boter, Babette Weller, Richard Molenkamp, Janette Rahamat-Langendoen, Reina Sikkema, Marion Koopmans                                                                                                                                                                                                                                                                                                                                                                                                                                                                                                                                                                                                                                                                    |
| EPI_ISL_13660191                                                                                                                                                                                                                                                                                                                                                                                                                                                                                                                                                                                                                                                                                                                                                                                                                                                                               | Hospital Center Luxembourg                                                                                                     | Laboratoire National de Santé Microbiology                                                                                                                          | Eric Hugoson, Ines Kozar, Sibel Berger, Anke Wienecke-Baldacchino, Bas Oude Munnink, Michel Kohnen, Jean-Hugues Francois, Tamir Abdelrahman                                                                                                                                                                                                                                                                                                                                                                                                                                                                                                                                                                                                                                                      |
| EPI_ISL_13705358                                                                                                                                                                                                                                                                                                                                                                                                                                                                                                                                                                                                                                                                                                                                                                                                                                                                               | Hosp. Alemoa Oswaldo Cruz                                                                                                      | Instituto Adolfo Lutz Strategic Laboratory                                                                                                                          | Claudio Tavares Sacchi, Karoline Rodrigues Campos, Ariadne Ferreira Amarante, Marlon Benedito Nascimento Santos, Alex Domingos Reis, Adriano Abbud, Adriana Bugno                                                                                                                                                                                                                                                                                                                                                                                                                                                                                                                                                                                                                                |
| EPI_ISL_13705407                                                                                                                                                                                                                                                                                                                                                                                                                                                                                                                                                                                                                                                                                                                                                                                                                                                                               | Hosp. Sirio-Libanes                                                                                                            | Instituto Adolfo Lutz Strategic Laboratory                                                                                                                          | Claudio Tavares Sacchi, Karoline Rodrigues Campos, Ariadne Ferreira Amarante, Marlon Benedito Nascimento Santos, Alex Domingos Reis, Adriano Abbud, Adriana Bugno                                                                                                                                                                                                                                                                                                                                                                                                                                                                                                                                                                                                                                |
| EPI_ISL_13717674                                                                                                                                                                                                                                                                                                                                                                                                                                                                                                                                                                                                                                                                                                                                                                                                                                                                               | Hospital Center Luxembourg                                                                                                     | Laboratoire National de Santé Microbiology                                                                                                                          | Eric Hugoson, Ines Kozar, Sibel Berger, Anke Wienecke-Baldacchino, Bas Oude Munnink, Michel Kohnen, Jean-Hugues Francois, Tamir Abdelrahman                                                                                                                                                                                                                                                                                                                                                                                                                                                                                                                                                                                                                                                      |
| EPI_ISL_13728303                                                                                                                                                                                                                                                                                                                                                                                                                                                                                                                                                                                                                                                                                                                                                                                                                                                                               | Department of Medical Microbiology & Infection prevention, Amsterdam University Medical Centers location AMC                   | Department of Medical Microbiology & Infection prevention, Amsterdam University Medical Centers location AMC                                                        | Matthijs Welkers, Jelle Koopsen, Robin van Houdt, Marcel Jonges, Sebastian Matamoros, Sjoerd Rebers, Fokla Zorgdrager, Sylvia Bruisten, Judith den Uil, Akke Cornelissen, Janke Schinkel, Menno de Jong, Gini van Rijckevorsel and Mariken van der Lubben on behalf of the Amsterdam Regional Genomic epidemiology and Outbreak Surveillance (ARGOS) consortium                                                                                                                                                                                                                                                                                                                                                                                                                                  |
| EPI_ISL_13732932                                                                                                                                                                                                                                                                                                                                                                                                                                                                                                                                                                                                                                                                                                                                                                                                                                                                               | Hosp. Sao Joaquim - Beneficencia Portuguesa                                                                                    | Instituto Adolfo Lutz Strategic Laboratory                                                                                                                          | Claudio Tavares Sacchi, Karoline Rodrigues Campos, Ariadne Ferreira Amarante, Marlon Benedito Nascimento Santos, Alex Domingos Reis, Adriano Abbud, Adriana Bugno                                                                                                                                                                                                                                                                                                                                                                                                                                                                                                                                                                                                                                |
| EPI_ISL_13734269                                                                                                                                                                                                                                                                                                                                                                                                                                                                                                                                                                                                                                                                                                                                                                                                                                                                               | Department of Clinical Sciences, Institute of Tropica Medicine                                                                 | Department of Clinical Sciences, Institute of Tropica Medicine                                                                                                      | De Baetselier,I., Van Dijk,C., Kenyon,C., Coppens,J., Smet,H., de Block,T., Coppens,S., Vanroye,F., Bugert,J., Gírl,P., Liesenborghs,L., Selhorst,P., Arien,K., Van den Bossche,D., Florence,E., Rezende,A.M., Vercauteren,K. and Van Esbroeck,M.                                                                                                                                                                                                                                                                                                                                                                                                                                                                                                                                                |
| EPI_ISL_13744902                                                                                                                                                                                                                                                                                                                                                                                                                                                                                                                                                                                                                                                                                                                                                                                                                                                                               | Department of Virology, Faculty of Medicine, University of Helsinki                                                            | Department of Virology, Faculty of Medicine, University of Helsinki                                                                                                 | Kant,R., Smura,T., Vauhkonen,H. and Vapalahti,O.                                                                                                                                                                                                                                                                                                                                                                                                                                                                                                                                                                                                                                                                                                                                                 |
| EPI_ISL_13822667, EPI_ISL_13822668, EPI_ISL_13822669, EPI_ISL_13822718                                                                                                                                                                                                                                                                                                                                                                                                                                                                                                                                                                                                                                                                                                                                                                                                                         | Erasmus Medical Center Department of Virology                                                                                  | Erasmus Medical Center Department of Virology                                                                                                                       | Bas Oude Munnink, Marjan Boter, Babette Weller, Richard Molenkamp, Janette Rahamat-Langendoen, Reina Sikkema, Marion Koopmans                                                                                                                                                                                                                                                                                                                                                                                                                                                                                                                                                                                                                                                                    |
| EPI_ISL_13827273, EPI_ISL_13827274, EPI_ISL_13827275, EPI_ISL_13827276, EPI_ISL_13827277, EPI_ISL_13827278, EPI_ISL_13827279, EPI_ISL_13827280, EPI_ISL_13827281, EPI_ISL_13827282                                                                                                                                                                                                                                                                                                                                                                                                                                                                                                                                                                                                                                                                                                             | Public Health Agency of Canada, National Microbiology Laboratory                                                               | Public Health Agency of Canada, National Microbiology Laboratory                                                                                                    | Duggan,A., Hole,D., Yadav,C., Knox,N., Haidl,E., Chapel,M., Domselaar,G.V., Fernando,L., Graham,M., Antonation,K., Audet,J., Hagan,M., Safronetz,D., Leung,A., Peters,G., Go,A., Laminman,V., Kaplen,B., Jolly,G., Marchand-Austin,A., Eshaghi,A., Patel,S.N., Hasso,M., Gubbay,J.B. and Olsha,R.                                                                                                                                                                                                                                                                                                                                                                                                                                                                                                |
| EPI_ISL_13833194, EPI_ISL_13833195, EPI_ISL_13833196, EPI_ISL_13833197                                                                                                                                                                                                                                                                                                                                                                                                                                                                                                                                                                                                                                                                                                                                                                                                                         | Laboratorio de Referencia Nacional de Virus Respiratorio. Centro Nacional de Salud Publica. Instituto Nacional de Salud.       | Laboratorio de Referencia Nacional de Virus Respiratorio. Centro Nacional de Salud Publica. Instituto Nacional de Salud.                                            | Carlos Padilla Rojas, Veronica Hurtado Vela, Iris Silva Molina, Luren Sevilla Castañeda, Víctor Jimenez Vasquez, Orson Mestanza Millones, Luis Barcena Flores, Wendy Lizarraga Olivares, Alicia Nuñez Llanos, Steve Acedo Lazo, Francisco Ascue Oroscio, Kelly Izarra Rojas, Princesa Medrano Alhuay, Karla Vasquez Cajachahua, Estela Huanan Angeles, Jorge Giraldo Chavez, Lilian Huarca Balbin, Lisbet Roxana Inga Angulo, Maria Sandra Villar Saavedra, Henri Bailon Calderon, Lely Solari Zerpa, Gloria Arotinco Garayar. Equipo de vigilancia genomica del Instituto Nacional de Salud.                                                                                                                                                                                                    |
| EPI_ISL_13842269, EPI_ISL_13842548                                                                                                                                                                                                                                                                                                                                                                                                                                                                                                                                                                                                                                                                                                                                                                                                                                                             | Center for Virology, Medical University of Vienna                                                                              | Medical University of Vienna Center for Virology                                                                                                                    | Jeremy V. Camp, Monika Redlberger-Fritz, Stephan W. Aberle                                                                                                                                                                                                                                                                                                                                                                                                                                                                                                                                                                                                                                                                                                                                       |
| EPI_ISL_13889435, EPI_ISL_13889436, EPI_ISL_13889437, EPI_ISL_13889438, EPI_ISL_13889439, EPI_ISL_13889440, EPI_ISL_13889441, EPI_ISL_13889442, EPI_ISL_13889443, EPI_ISL_13889444, EPI_ISL_13889445, EPI_ISL_13889446, EPI_ISL_13889447, EPI_ISL_13889448, EPI_ISL_13889449, EPI_ISL_13889450, EPI_ISL_13889451, EPI_ISL_13889452, EPI_ISL_13889453, EPI_ISL_13889454, EPI_ISL_13889455, EPI_ISL_13889456, EPI_ISL_13889457, EPI_ISL_13889458, EPI_ISL_13889459, EPI_ISL_13889460, EPI_ISL_13889461, EPI_ISL_13889462, EPI_ISL_13889463, EPI_ISL_13889464, EPI_ISL_13889465, EPI_ISL_13889466, EPI_ISL_13889467, EPI_ISL_13889468, EPI_ISL_13889469, EPI_ISL_13889470, EPI_ISL_13889471, EPI_ISL_13889472, EPI_ISL_13889473, EPI_ISL_13889474, EPI_ISL_13889475, EPI_ISL_13889476, EPI_ISL_13889477, EPI_ISL_13889478, EPI_ISL_13889479, EPI_ISL_13889480, EPI_ISL_13889481, EPI_ISL_13889482 | see above                                                                                                                      | Charité Universitätsmedizin Berlin, Institut für Virologie/Labor Berlin                                                                                             | Terry C. Jones, Julia Schneider, Barbara Mühlemann, Talitha Veith, Jörn Beheim-Schwarzbach, Julia Tesch, Marie Luisa Schmidt, Felix Walper, Tobias Bleicker, Caroline Isner, Frieder Pfäfflin, Ricardo Niklas Werner, Victor M. Corman, Christian Drosten                                                                                                                                                                                                                                                                                                                                                                                                                                                                                                                                        |
| EPI_ISL_13908329, EPI_ISL_13908330, EPI_ISL_13908331, EPI_ISL_13908332, EPI_ISL_13908333, EPI_ISL_13908334, EPI_ISL_13908335, EPI_ISL_13908336, EPI_ISL_13908337, EPI_ISL_13908338, EPI_ISL_13908339, EPI_ISL_13908340, EPI_ISL_13908341, EPI_ISL_13908342, EPI_ISL_13908343, EPI_ISL_13908344,                                                                                                                                                                                                                                                                                                                                                                                                                                                                                                                                                                                                |                                                                                                                                |                                                                                                                                                                     |                                                                                                                                                                                                                                                                                                                                                                                                                                                                                                                                                                                                                                                                                                                                                                                                  |

|                                                                                                                                                                                                                                                                                                                                                                                                                                                                                                                                                                                                                                                                                                                                                                                                                                                                                                                                                                                                                                                                                                                                                                                                                                                                                                                                                                                    |                                                                                                                                                   |                                                                                                                                                   |                                                                                                                                                                                                                                                                                                                                                                                                                                                                                                                                                                                               |
|------------------------------------------------------------------------------------------------------------------------------------------------------------------------------------------------------------------------------------------------------------------------------------------------------------------------------------------------------------------------------------------------------------------------------------------------------------------------------------------------------------------------------------------------------------------------------------------------------------------------------------------------------------------------------------------------------------------------------------------------------------------------------------------------------------------------------------------------------------------------------------------------------------------------------------------------------------------------------------------------------------------------------------------------------------------------------------------------------------------------------------------------------------------------------------------------------------------------------------------------------------------------------------------------------------------------------------------------------------------------------------|---------------------------------------------------------------------------------------------------------------------------------------------------|---------------------------------------------------------------------------------------------------------------------------------------------------|-----------------------------------------------------------------------------------------------------------------------------------------------------------------------------------------------------------------------------------------------------------------------------------------------------------------------------------------------------------------------------------------------------------------------------------------------------------------------------------------------------------------------------------------------------------------------------------------------|
| ISL_13908345                                                                                                                                                                                                                                                                                                                                                                                                                                                                                                                                                                                                                                                                                                                                                                                                                                                                                                                                                                                                                                                                                                                                                                                                                                                                                                                                                                       |                                                                                                                                                   |                                                                                                                                                   |                                                                                                                                                                                                                                                                                                                                                                                                                                                                                                                                                                                               |
| see above                                                                                                                                                                                                                                                                                                                                                                                                                                                                                                                                                                                                                                                                                                                                                                                                                                                                                                                                                                                                                                                                                                                                                                                                                                                                                                                                                                          | Public Health Agency of Canada, National Microbiology Laboratory                                                                                  | Public Health Agency of Canada, National Microbiology Laboratory                                                                                  | Duggan,A., Hole,D., Yadav,C., Knox,N., Chapel,M., Tyler,A., Haidl,E., Domselaar,G.V., Antonation,K., Audet,J., Fernando,L., Hagan,M., Safronetz,D., Graham,M., Peters,G., Go,A., Laminman,V., Kaplen,B., Leung,A., Jolly,G., Fafard,J., Charest,H. and Leva de,I.                                                                                                                                                                                                                                                                                                                             |
| EPI_ISL_13955501                                                                                                                                                                                                                                                                                                                                                                                                                                                                                                                                                                                                                                                                                                                                                                                                                                                                                                                                                                                                                                                                                                                                                                                                                                                                                                                                                                   | Public Health Authority of the Slovak Republic                                                                                                    | Laboratory of Genomics and Bioinformatics, Comenius University Science Park                                                                       | Tomáš Szemes, Edita Staroová, Elena Tichá, Lucia Ševíková, Terézia Vrabová, Tatiana Sedláková, Miroslav Böhmer, Jaroslav Budiš, Pavol Mišenko                                                                                                                                                                                                                                                                                                                                                                                                                                                 |
| EPI_ISL_13958697                                                                                                                                                                                                                                                                                                                                                                                                                                                                                                                                                                                                                                                                                                                                                                                                                                                                                                                                                                                                                                                                                                                                                                                                                                                                                                                                                                   | Research and Evaluation, UKHSA                                                                                                                    | Research and Evaluation, UKHSA                                                                                                                    | Groves,N., Osman,K.L., Lewandowski,K.S., Carter,D.P., Pullan,S.T., Myers,R., Vipond,R. and Chand,M.                                                                                                                                                                                                                                                                                                                                                                                                                                                                                           |
| EPI_ISL_13983354, EPI_ISL_13983355                                                                                                                                                                                                                                                                                                                                                                                                                                                                                                                                                                                                                                                                                                                                                                                                                                                                                                                                                                                                                                                                                                                                                                                                                                                                                                                                                 | Instituto de Infectologia Emilio Ribas                                                                                                            | Instituto Adolfo Lutz Strategic Laboratory                                                                                                        | Claudio Tavares Sacchi, Karoline Rodrigues Campos, Ariadne Ferreira Amarante, Marlon Benedito Nascimento Santos, Alex Domingos Reis, Adriano Abbud, Adriana Bugno                                                                                                                                                                                                                                                                                                                                                                                                                             |
| EPI_ISL_13983356                                                                                                                                                                                                                                                                                                                                                                                                                                                                                                                                                                                                                                                                                                                                                                                                                                                                                                                                                                                                                                                                                                                                                                                                                                                                                                                                                                   | INSPI-Centro de Referencia Nacional de Virus Exantemáticos, Gastroentéricos y Transmitedo por Vectores.                                           | INSPI-Dirección Técnica de Investigación, Desarrollo e Innovación INSPI-Centro de Referencia Nacional de Genómica, Secuenciación y Bioinformática | Andrés Carrazco-Montalvo, Diana Gutiérrez, Naomi Mora, Silvia Salgado-Cisneros, Johana Parrales-Valdiviezo, Martha Sánchez-Domenech, Diego Morales, Gulnara Borja-Cabrera, Leandro Patiño*.                                                                                                                                                                                                                                                                                                                                                                                                   |
| EPI_ISL_13993734, EPI_ISL_13993735, EPI_ISL_13993737, EPI_ISL_13993738, EPI_ISL_13993739                                                                                                                                                                                                                                                                                                                                                                                                                                                                                                                                                                                                                                                                                                                                                                                                                                                                                                                                                                                                                                                                                                                                                                                                                                                                                           | California Department of Public Health                                                                                                            | California Department of Public Health                                                                                                            | Viral and Rickettsial Disease Laboratory                                                                                                                                                                                                                                                                                                                                                                                                                                                                                                                                                      |
| EPI_ISL_14003930                                                                                                                                                                                                                                                                                                                                                                                                                                                                                                                                                                                                                                                                                                                                                                                                                                                                                                                                                                                                                                                                                                                                                                                                                                                                                                                                                                   | University of Rochester Medical Center                                                                                                            | University of Rochester Medical Center                                                                                                            | Andrew Cameron, Mondraya Howard, Sara Connelly, Dwight Hardy, Kelly DeLary                                                                                                                                                                                                                                                                                                                                                                                                                                                                                                                    |
| EPI_ISL_14021725                                                                                                                                                                                                                                                                                                                                                                                                                                                                                                                                                                                                                                                                                                                                                                                                                                                                                                                                                                                                                                                                                                                                                                                                                                                                                                                                                                   | Hosp. Municipal Enf. Antonio Policarpo de Oliveira                                                                                                | Instituto Adolfo Lutz Strategic Laboratory                                                                                                        | Claudio Tavares Sacchi, Karoline Rodrigues Campos, Ariadne Ferreira Amarante, Marlon Benedito Nascimento Santos, Alex Domingos Reis, Adriano Abbud, Adriana Bugno                                                                                                                                                                                                                                                                                                                                                                                                                             |
| EPI_ISL_14050451, EPI_ISL_14050452, EPI_ISL_14050453, EPI_ISL_14050454, EPI_ISL_14050455, EPI_ISL_14050456, EPI_ISL_14050457, EPI_ISL_14050458                                                                                                                                                                                                                                                                                                                                                                                                                                                                                                                                                                                                                                                                                                                                                                                                                                                                                                                                                                                                                                                                                                                                                                                                                                     | Public Health Agency of Canada, National Microbiology Laboratory                                                                                  | Public Health Agency of Canada, National Microbiology Laboratory                                                                                  | Duggan,A., Hole,D., Yadav,C., Knox,N., Tyler,A., Haidl,E., Chapel,M., Domselaar,G.V., Graham,M., Audet,J., Fernando,L., Hagan,M., Safronetz,D., Leung,A., Peters,G., Go,A., Laminman,V., Kaplen,B., Antonation,K., Jolly,G., Griffiths,E., Charest,H., Leva de,I. and Fafard,J.                                                                                                                                                                                                                                                                                                               |
| EPI_ISL_14070493, EPI_ISL_14070852, EPI_ISL_14070854, EPI_ISL_14070855                                                                                                                                                                                                                                                                                                                                                                                                                                                                                                                                                                                                                                                                                                                                                                                                                                                                                                                                                                                                                                                                                                                                                                                                                                                                                                             | Instituto de Infectologia Emilio Ribas                                                                                                            | Instituto Adolfo Lutz Strategic Laboratory                                                                                                        | Claudio Tavares Sacchi, Karoline Rodrigues Campos, Ariadne Ferreira Amarante, Marlon Benedito Nascimento Santos, Alex Domingos Reis, Adriano Abbud, Adriana Bugno                                                                                                                                                                                                                                                                                                                                                                                                                             |
| EPI_ISL_14153982                                                                                                                                                                                                                                                                                                                                                                                                                                                                                                                                                                                                                                                                                                                                                                                                                                                                                                                                                                                                                                                                                                                                                                                                                                                                                                                                                                   | Vajira Hospital                                                                                                                                   | National Institute of Health, Department of Medical Sciences, Ministry of Public Health, Thailand                                                 | Pilailuk Okada; Siripaporn Phuygun; Nuttida Thongpramul; Thanutsapa Thanadachakul; Kazuhisa Okada; Archawin Rojanawiwat; Chakkarat Pitayawonganon; Supakit Sirilak                                                                                                                                                                                                                                                                                                                                                                                                                            |
| EPI_ISL_14166709                                                                                                                                                                                                                                                                                                                                                                                                                                                                                                                                                                                                                                                                                                                                                                                                                                                                                                                                                                                                                                                                                                                                                                                                                                                                                                                                                                   | Medical University of Vienna Center for Virology                                                                                                  | Medical University of Vienna Center for Virology                                                                                                  | Jeremy V Camp, Monika Redlberger-Fritz, Stephan W. Aberle                                                                                                                                                                                                                                                                                                                                                                                                                                                                                                                                     |
| EPI_ISL_14167248, EPI_ISL_14167573, EPI_ISL_14167574, EPI_ISL_14167575                                                                                                                                                                                                                                                                                                                                                                                                                                                                                                                                                                                                                                                                                                                                                                                                                                                                                                                                                                                                                                                                                                                                                                                                                                                                                                             | Medical University of Vienna Center for Virology                                                                                                  | Medical University of Vienna Center for Virology                                                                                                  | Jeremy V. Camp, Monika Redlberger-Fritz, Stephan W. Aberle                                                                                                                                                                                                                                                                                                                                                                                                                                                                                                                                    |
| EPI_ISL_14170201                                                                                                                                                                                                                                                                                                                                                                                                                                                                                                                                                                                                                                                                                                                                                                                                                                                                                                                                                                                                                                                                                                                                                                                                                                                                                                                                                                   | Erasmus Medical Center Department of Virology                                                                                                     | Erasmus Medical Center Department of Virology                                                                                                     | Bas Oude Munnink, Marjan Boter, Babette Weller, Babs Verstrepen, Richard Molenkamp, Janette Rahamat-Langendoen, Reina Sikkema, Marion Koopmans                                                                                                                                                                                                                                                                                                                                                                                                                                                |
| EPI_ISL_14189016                                                                                                                                                                                                                                                                                                                                                                                                                                                                                                                                                                                                                                                                                                                                                                                                                                                                                                                                                                                                                                                                                                                                                                                                                                                                                                                                                                   | Los Angeles County Public Health Laboratories                                                                                                     | Los Angeles County Public Health Laboratories                                                                                                     | P. Hemarajata et al.                                                                                                                                                                                                                                                                                                                                                                                                                                                                                                                                                                          |
| EPI_ISL_14207724, EPI_ISL_14207725, EPI_ISL_14207726, EPI_ISL_14207727, EPI_ISL_14207728, EPI_ISL_14207729, EPI_ISL_14207730, EPI_ISL_14207731, EPI_ISL_14207732, EPI_ISL_14207733, EPI_ISL_14207734, EPI_ISL_14207735, EPI_ISL_14207736, EPI_ISL_14207737, EPI_ISL_14207738, EPI_ISL_14207739                                                                                                                                                                                                                                                                                                                                                                                                                                                                                                                                                                                                                                                                                                                                                                                                                                                                                                                                                                                                                                                                                     | Laboratorio de Referencia Nacional de Virus Respiratorio. Centro Nacional de Salud Publica. Instituto Nacional de Salud.                          | Laboratorio de Referencia Nacional de Virus Respiratorio. Centro Nacional de Salud Publica. Instituto Nacional de Salud.                          | Carlos Padilla Rojas, Veronica Hurtado Vela, Iris Silva Molina, Luren Sevilla Castañeda, Victor Jimenez Vasquez, Orson Mestanza Millones, Luis Barcena Flores, Wendy Lizarraga Olivares, Alicia Nuñez Llanos, Steve Acedo Lazo, Francisco Ascue Oroscio, Kelly Izarra Rojas, Princesa Medrano Alhuay, Karla Vasquez Cajachahua, Estela Huaman Angeles, Jorge Giraldo Chavez, Lilian Huarca Balbin, Lisbet Roxana Inga Angulo, Maria Sandra Villar Saavedra, Henri Bailon Calderon, Lely Solari Zerpa, Gloria Arotinco Garayar. Equipo de vigilancia genomica del Instituto Nacional de Salud. |
| EPI_ISL_14211644, EPI_ISL_14211645                                                                                                                                                                                                                                                                                                                                                                                                                                                                                                                                                                                                                                                                                                                                                                                                                                                                                                                                                                                                                                                                                                                                                                                                                                                                                                                                                 | Public Health Authority of the Slovak Republic                                                                                                    | Laboratory of Genomics and Bioinformatics, Comenius University Science Park                                                                       | Tomáš Szemes, Edita Staroová, Elena Tichá, Lucia Ševíková, Terézia Vrabová, Tatiana Sedláková, Miroslav Böhmer, Jaroslav Budiš, Pavol Mišenko                                                                                                                                                                                                                                                                                                                                                                                                                                                 |
| EPI_ISL_14224334                                                                                                                                                                                                                                                                                                                                                                                                                                                                                                                                                                                                                                                                                                                                                                                                                                                                                                                                                                                                                                                                                                                                                                                                                                                                                                                                                                   | Genetica Molecular and Subdepartamento de Virologia ISP Chile                                                                                     | Instituto de Salud Publica de Chile                                                                                                               | Paulo C. Covarrubias, Andrés E. Castillo, Constanza Campano, Mariela Guajardo, Bárbara Parra, Rodrigo Fasce Pineda, Jorge Fernández                                                                                                                                                                                                                                                                                                                                                                                                                                                           |
| EPI_ISL_14251112                                                                                                                                                                                                                                                                                                                                                                                                                                                                                                                                                                                                                                                                                                                                                                                                                                                                                                                                                                                                                                                                                                                                                                                                                                                                                                                                                                   | University of Rochester Medical Center                                                                                                            | University of Rochester Medical Center                                                                                                            | Andrew Cameron, Mondraya Howard, Joel Maki, Sara Connelly, Kelly Delary, Dwight Hardy                                                                                                                                                                                                                                                                                                                                                                                                                                                                                                         |
| EPI_ISL_14254435, EPI_ISL_14254436, EPI_ISL_14254437, EPI_ISL_14254438                                                                                                                                                                                                                                                                                                                                                                                                                                                                                                                                                                                                                                                                                                                                                                                                                                                                                                                                                                                                                                                                                                                                                                                                                                                                                                             | Erasmus Medical Center Department of Virology                                                                                                     | Erasmus Medical Center Department of Virology                                                                                                     | Bas Oude Munnink, Marjan Boter, Babette Weller, Babs Verstrepen, Richard Molenkamp, Janette Rahamat-Langendoen, Reina Sikkema, Marion Koopmans                                                                                                                                                                                                                                                                                                                                                                                                                                                |
| EPI_ISL_14326638, EPI_ISL_14326639, EPI_ISL_14326640, EPI_ISL_14326641, EPI_ISL_14326642, EPI_ISL_14326643                                                                                                                                                                                                                                                                                                                                                                                                                                                                                                                                                                                                                                                                                                                                                                                                                                                                                                                                                                                                                                                                                                                                                                                                                                                                         | Environmental, Agricultural, and Occupational Health, University of Nebraska Medical Center, 984388 Nebraska Medical Center                       | Environmental, Agricultural, and Occupational Health, University of Nebraska Medical Center, 984388 Nebraska Medical Center                       | Tegomoh,B., Cross,S.T., Chapman,R.C., Bernhard,K., McCutchen,E.L., Fauver,J.R., Pratt,C.B., Warden,D.E., Iwen,P.C., Donahue,M. and Wiley,M.R.                                                                                                                                                                                                                                                                                                                                                                                                                                                 |
| EPI_ISL_14326644                                                                                                                                                                                                                                                                                                                                                                                                                                                                                                                                                                                                                                                                                                                                                                                                                                                                                                                                                                                                                                                                                                                                                                                                                                                                                                                                                                   | Environmental, Agricultural, and Occupational Health, University of Nebraska Medical Center, 984388 Nebraska Medical Center                       | Environmental, Agricultural, and Occupational Health, University of Nebraska Medical Center, 984388 Nebraska Medical Center                       | Tegomoh,B., Cross,S.T., Chapman,R.C., Bernhard,K., McCutchen,E.L., Fauver,J.R., Pratt,C.B., Warden,D.E., Iwen,P.C., Donahue,M. and Wiley,M.R                                                                                                                                                                                                                                                                                                                                                                                                                                                  |
| EPI_ISL_14414948                                                                                                                                                                                                                                                                                                                                                                                                                                                                                                                                                                                                                                                                                                                                                                                                                                                                                                                                                                                                                                                                                                                                                                                                                                                                                                                                                                   | UMS Parque Industrial Curitiba                                                                                                                    | Instituto Adolfo Lutz Strategic Laboratory                                                                                                        | Claudio Tavares Sacchi, Karoline Rodrigues Campos, Ariadne Ferreira Amarante, Marlon Benedito Nascimento Santos, Alex Domingos Reis, Adriano Abbud, Adriana Bugno                                                                                                                                                                                                                                                                                                                                                                                                                             |
| EPI_ISL_14415810                                                                                                                                                                                                                                                                                                                                                                                                                                                                                                                                                                                                                                                                                                                                                                                                                                                                                                                                                                                                                                                                                                                                                                                                                                                                                                                                                                   | CTA Sao Miguel                                                                                                                                    | Instituto Adolfo Lutz Strategic Laboratory                                                                                                        | Claudio Tavares Sacchi, Karoline Rodrigues Campos, Ariadne Ferreira Amarante, Marlon Benedito Nascimento Santos, Alex Domingos Reis, Adriano Abbud, Adriana Bugno                                                                                                                                                                                                                                                                                                                                                                                                                             |
| EPI_ISL_14439712, EPI_ISL_14439713, EPI_ISL_14439714, EPI_ISL_14439715, EPI_ISL_14439716, EPI_ISL_14439717, EPI_ISL_14439718, EPI_ISL_14439719, EPI_ISL_14439720, EPI_ISL_14439721, EPI_ISL_14439722, EPI_ISL_14439723, EPI_ISL_14439724, EPI_ISL_14439725, EPI_ISL_14439726, EPI_ISL_14439727, EPI_ISL_14439728, EPI_ISL_14439729, EPI_ISL_14439730, EPI_ISL_14439731, EPI_ISL_14439732, EPI_ISL_14439733, EPI_ISL_14439734, EPI_ISL_14439735, EPI_ISL_14439736, EPI_ISL_14439737, EPI_ISL_14439738, EPI_ISL_14439739, EPI_ISL_14439740, EPI_ISL_14439741, EPI_ISL_14439742, EPI_ISL_14439743, EPI_ISL_14439744, EPI_ISL_14439745, EPI_ISL_14439746, EPI_ISL_14439747, EPI_ISL_14439748, EPI_ISL_14439749, EPI_ISL_14439750, EPI_ISL_14439751, EPI_ISL_14439752, EPI_ISL_14439753, EPI_ISL_14439754, EPI_ISL_14439755, EPI_ISL_14439756, EPI_ISL_14439757, EPI_ISL_14439758, EPI_ISL_14439759, EPI_ISL_14439760, EPI_ISL_14439761, EPI_ISL_14439762, EPI_ISL_14439763, EPI_ISL_14439764, EPI_ISL_14439765, EPI_ISL_14439766, EPI_ISL_14439767, EPI_ISL_14439768, EPI_ISL_14439769, EPI_ISL_14439770, EPI_ISL_14439771, EPI_ISL_14439772, EPI_ISL_14439773, EPI_ISL_14439774, EPI_ISL_14439775, EPI_ISL_14439776, EPI_ISL_14439777, EPI_ISL_14439778, EPI_ISL_14439779, EPI_ISL_14439780, EPI_ISL_14439781, EPI_ISL_14439782, EPI_ISL_14439783, EPI_ISL_14439784, EPI_ISL_14439785 | Research and Evaluation, UKHSA                                                                                                                    | Groves,N., Osman,K.L., Lewandowski,K.S., Carter,D.P., Pullan,S.T., Myers,R., Vipond,R. and Chand,M.                                               |                                                                                                                                                                                                                                                                                                                                                                                                                                                                                                                                                                                               |
| see above                                                                                                                                                                                                                                                                                                                                                                                                                                                                                                                                                                                                                                                                                                                                                                                                                                                                                                                                                                                                                                                                                                                                                                                                                                                                                                                                                                          | Research and Evaluation, UKHSA                                                                                                                    | Research and Evaluation, UKHSA                                                                                                                    | Groves,N., Osman,K.L., Lewandowski,K.S., Carter,D.P., Pullan,S.T., Myers,R., Vipond,R. and Chand,M.                                                                                                                                                                                                                                                                                                                                                                                                                                                                                           |
| EPI_ISL_14445098, EPI_ISL_14445099, EPI_ISL_14445100, EPI_ISL_14445101, EPI_ISL_14445102, EPI_ISL_14445103, EPI_ISL_14445104, EPI_ISL_14445105, EPI_ISL_14445106, EPI_ISL_14445107, EPI_ISL_14445108, EPI_ISL_14445109, EPI_ISL_14445110, EPI_ISL_14445111, EPI_ISL_14445112, EPI_ISL_14445113, EPI_ISL_14445114, EPI_ISL_14445115, EPI_ISL_14445116, EPI_ISL_14445117, EPI_ISL_14445118, EPI_ISL_14445119, EPI_ISL_14445120, EPI_ISL_14445121, EPI_ISL_14445122, EPI_ISL_14445123, EPI_ISL_14445124, EPI_ISL_14445125, EPI_ISL_14445126, EPI_ISL_14445127, EPI_ISL_14445128, EPI_ISL_14445129, EPI_ISL_14445130, EPI_ISL_14445131, EPI_ISL_14445132, EPI_ISL_14445133, EPI_ISL_14445134, EPI_ISL_14445135, EPI_ISL_14445136, EPI_ISL_14445137, EPI_ISL_14445138, EPI_ISL_14445139, EPI_ISL_14445140, EPI_ISL_14445141, EPI_ISL_14445142, EPI_ISL_14445143, EPI_ISL_14445144, EPI_ISL_14445145, EPI_ISL_14445146, EPI_ISL_14445147, EPI_ISL_14445148, EPI_ISL_14445149, EPI_ISL_14445150, EPI_ISL_14445151, EPI_ISL_14445152, EPI_ISL_14445153                                                                                                                                                                                                                                                                                                                                     | Laboratorio de Referencia Nacional de Virus Respiratorio. Centro Nacional de Salud Publica. Instituto Nacional de Salud.                          | Laboratorio de Referencia Nacional de Virus Respiratorio. Centro Nacional de Salud Publica. Instituto Nacional de Salud.                          | Carlos Padilla Rojas, Veronica Hurtado Vela, Iris Silva Molina, Luren Sevilla Castañeda, Victor Jimenez Vasquez, Orson Mestanza Millones, Luis Barcena Flores, Wendy Lizarraga Olivares, Alicia Nuñez Llanos, Steve Acedo Lazo, Francisco Ascue Oroscio, Kelly Izarra Rojas, Princesa Medrano Alhuay, Karla Vasquez Cajachahua, Estela Huaman Angeles, Jorge Giraldo Chavez, Lilian Huarca Balbin, Lisbet Roxana Inga Angulo, Maria Sandra Villar Saavedra, Henri Bailon Calderon, Lely Solari Zerpa, Gloria Arotinco Garayar. Equipo de vigilancia genomica del Instituto Nacional de Salud. |
| see above                                                                                                                                                                                                                                                                                                                                                                                                                                                                                                                                                                                                                                                                                                                                                                                                                                                                                                                                                                                                                                                                                                                                                                                                                                                                                                                                                                          | Laboratorio de Referencia Nacional de Virus Respiratorio. Centro Nacional de Salud Publica. Instituto Nacional de Salud.                          | Laboratorio de Referencia Nacional de Virus Respiratorio. Centro Nacional de Salud Publica. Instituto Nacional de Salud.                          | Carlos Padilla Rojas, Veronica Hurtado Vela, Iris Silva Molina, Luren Sevilla Castañeda, Victor Jimenez Vasquez, Orson Mestanza Millones, Luis Barcena Flores, Wendy Lizarraga Olivares, Alicia Nuñez Llanos, Steve Acedo Lazo, Francisco Ascue Oroscio, Kelly Izarra Rojas, Princesa Medrano Alhuay, Karla Vasquez Cajachahua, Estela Huaman Angeles, Jorge Giraldo Chavez, Lilian Huarca Balbin, Lisbet Roxana Inga Angulo, Maria Sandra Villar Saavedra, Henri Bailon Calderon, Lely Solari Zerpa, Gloria Arotinco Garayar. Equipo de vigilancia genomica del Instituto Nacional de Salud. |
| EPI_ISL_14465517                                                                                                                                                                                                                                                                                                                                                                                                                                                                                                                                                                                                                                                                                                                                                                                                                                                                                                                                                                                                                                                                                                                                                                                                                                                                                                                                                                   | Centro de Desenvolvimento Científico e Tecnológico (CDCT), Centro Estadual de Vigilância em Saúde (CEVS) da Secretaria Estadual da Saúde (SES-RS) | Centro de Desenvolvimento Científico e Tecnológico (CDCT), Centro Estadual de Vigilância em Saúde (CEVS) da Secretaria Estadual da Saúde (SES-RS) | Richard Steiner Salvato, Regina Bones Barcellos, Fernanda Marques Godinho                                                                                                                                                                                                                                                                                                                                                                                                                                                                                                                     |
| EPI_ISL_14467428, EPI_ISL_14467429                                                                                                                                                                                                                                                                                                                                                                                                                                                                                                                                                                                                                                                                                                                                                                                                                                                                                                                                                                                                                                                                                                                                                                                                                                                                                                                                                 | Laboratório Central de Saúde Pública do Amazonas -                                                                                                | Laboratório de Ecologia de Doenças Transmissíveis na                                                                                              | Victor Souza, Fernanda Nascimento, Matilde Mejia, Dejanane Silva, Luciana Gonçalves, Tatyana Costa Amorim Ramos, Ana Ruth Lima Arcanjo,                                                                                                                                                                                                                                                                                                                                                                                                                                                       |

| LACEN-AM                                                                                                                                                                                                                                                                                                                                                                                                                                                                                                                                                                                                                                                                                                   |                                                                                                                          | Amazônia, Instituto Leônidas e Maria Deane - Fiocruz Amazônia                                                            | Valdinete Nascimento, Felipe Naveca on behalf of the Fiocruz COVID-19 Genomic Surveillance Network                                                                                                                                                                                                                                                                                                                                                                                                                                                                                            |  |
|------------------------------------------------------------------------------------------------------------------------------------------------------------------------------------------------------------------------------------------------------------------------------------------------------------------------------------------------------------------------------------------------------------------------------------------------------------------------------------------------------------------------------------------------------------------------------------------------------------------------------------------------------------------------------------------------------------|--------------------------------------------------------------------------------------------------------------------------|--------------------------------------------------------------------------------------------------------------------------|-----------------------------------------------------------------------------------------------------------------------------------------------------------------------------------------------------------------------------------------------------------------------------------------------------------------------------------------------------------------------------------------------------------------------------------------------------------------------------------------------------------------------------------------------------------------------------------------------|--|
| EPI_ISL_14487650                                                                                                                                                                                                                                                                                                                                                                                                                                                                                                                                                                                                                                                                                           | Public Health Agency of Canada, National Microbiology Laboratory                                                         | Public Health Agency of Canada, National Microbiology Laboratory                                                         | Duggan,A., Hole,D., Yadav,C., Knox,N., Tyler,A., Haidl,E., Chapel,M., Domselaar,G.V., Graham,M., Audet,J., Fernando,L., Antonation,K., Safronetz,D., Hagan,M., Peters,G., Go,A., Laminman,V., Kaplen,B., Jolly,G., Griffiths,E., Leung,A., MacKenzie,K., Lang,A. and Minion,J.                                                                                                                                                                                                                                                                                                                |  |
| EPI_ISL_14515173, EPI_ISL_14515174, EPI_ISL_14515177, EPI_ISL_14515179, EPI_ISL_14515182, EPI_ISL_14515186, EPI_ISL_14515187, EPI_ISL_14515188, EPI_ISL_14515193, EPI_ISL_14515201, EPI_ISL_14515202, EPI_ISL_14515203, EPI_ISL_14515207, EPI_ISL_14515210, EPI_ISL_14515213, EPI_ISL_14515214, EPI_ISL_14515219, EPI_ISL_14515220, EPI_ISL_14515223                                                                                                                                                                                                                                                                                                                                                       |                                                                                                                          |                                                                                                                          |                                                                                                                                                                                                                                                                                                                                                                                                                                                                                                                                                                                               |  |
| see above                                                                                                                                                                                                                                                                                                                                                                                                                                                                                                                                                                                                                                                                                                  | Department of Infectious Diseases, National Institute of Health Doutor Ricardo Jorge, Portugal (INSA)                    | Department of Infectious Diseases, National Institute of Health Doutor Ricardo Jorge, Portugal (INSA)                    | Isidro,J., Borges,V., Pinto,M., Sobral,D., Santos,J., Nunes,A., Mixao,V., Ferreira,R., Santos,D., Duarte,S., Vieira,L., Borrego,M.J., Nuncio,S., Lopes de Carvalho,I., Pelerito,A., Cordeiro,R. and Gomes,J.P.                                                                                                                                                                                                                                                                                                                                                                                |  |
| EPI_ISL_14526939, EPI_ISL_14526940, EPI_ISL_14526942, EPI_ISL_14526943, EPI_ISL_14526944, EPI_ISL_14526945, EPI_ISL_14526946, EPI_ISL_14526948, EPI_ISL_14526949, EPI_ISL_14526950, EPI_ISL_14526952, EPI_ISL_14526953, EPI_ISL_14526954, EPI_ISL_14526955, EPI_ISL_14526956                                                                                                                                                                                                                                                                                                                                                                                                                               |                                                                                                                          |                                                                                                                          |                                                                                                                                                                                                                                                                                                                                                                                                                                                                                                                                                                                               |  |
| see above                                                                                                                                                                                                                                                                                                                                                                                                                                                                                                                                                                                                                                                                                                  | Connecticut Department of Public Health                                                                                  | Grubaugh Lab - Yale School of Public Health                                                                              | Nicholas F. G. Chen, Chrispin Chaguza, Kien Pham, Nathan D. Grubaugh, Christina Nishimura, Claire Pearson, Kutluhan Incekara, Jian Ping Huang, Emily Gagnon, Ethan Reeve, Jafar Razeq, Anthony Muyombwe, Chantal B. F. Vogels                                                                                                                                                                                                                                                                                                                                                                 |  |
| EPI_ISL_14541645, EPI_ISL_14541647, EPI_ISL_14541649, EPI_ISL_14541652, EPI_ISL_14541654                                                                                                                                                                                                                                                                                                                                                                                                                                                                                                                                                                                                                   | Public Health Authority of the Slovak Republic                                                                           | Laboratory of Genomics and Bioinformatics, Comenius University Science Park                                              | Tomáš Szemes, Edita Staroová, Elena Tichá, Lucia Ševíková, Terézia Vrabová, Tatiana Sedláková, Miroslav Böhmer, Jaroslav Budiš, Pavol Mišenko                                                                                                                                                                                                                                                                                                                                                                                                                                                 |  |
| EPI_ISL_14561924                                                                                                                                                                                                                                                                                                                                                                                                                                                                                                                                                                                                                                                                                           | Los Angeles County Public Health Laboratories                                                                            | Los Angeles County Public Health Laboratories                                                                            | P. Hemarajata et al.                                                                                                                                                                                                                                                                                                                                                                                                                                                                                                                                                                          |  |
| EPI_ISL_14571429                                                                                                                                                                                                                                                                                                                                                                                                                                                                                                                                                                                                                                                                                           | Hosp. Municipal Dr. Jose de Carvalho Florence                                                                            | Instituto Adolfo Lutz Strategic Laboratory                                                                               | Claudio Tavares Sacchi, Karoline Rodrigues Campos, Ariadne Ferreira Amarante, Marlon Benedito Nascimento Santos, Alex Domingos Reis, Adriano Abbud, Adriana Bugno                                                                                                                                                                                                                                                                                                                                                                                                                             |  |
| EPI_ISL_14571433                                                                                                                                                                                                                                                                                                                                                                                                                                                                                                                                                                                                                                                                                           | Casa de Saude Stella Maris                                                                                               | Instituto Adolfo Lutz Strategic Laboratory                                                                               | Claudio Tavares Sacchi, Karoline Rodrigues Campos, Ariadne Ferreira Amarante, Marlon Benedito Nascimento Santos, Alex Domingos Reis, Adriano Abbud, Adriana Bugno                                                                                                                                                                                                                                                                                                                                                                                                                             |  |
| EPI_ISL_14571435                                                                                                                                                                                                                                                                                                                                                                                                                                                                                                                                                                                                                                                                                           | Secretetaria Municipal de Saude de Sertaozinho                                                                           | Instituto Adolfo Lutz Strategic Laboratory                                                                               | Claudio Tavares Sacchi, Karoline Rodrigues Campos, Ariadne Ferreira Amarante, Marlon Benedito Nascimento Santos, Alex Domingos Reis, Adriano Abbud, Adriana Bugno                                                                                                                                                                                                                                                                                                                                                                                                                             |  |
| EPI_ISL_14571439                                                                                                                                                                                                                                                                                                                                                                                                                                                                                                                                                                                                                                                                                           | Secretetaria Municipal de Saude de Sata Barbara D Oeste                                                                  | Instituto Adolfo Lutz Strategic Laboratory                                                                               | Claudio Tavares Sacchi, Karoline Rodrigues Campos, Ariadne Ferreira Amarante, Marlon Benedito Nascimento Santos, Alex Domingos Reis, Adriano Abbud, Adriana Bugno                                                                                                                                                                                                                                                                                                                                                                                                                             |  |
| EPI_ISL_14571441                                                                                                                                                                                                                                                                                                                                                                                                                                                                                                                                                                                                                                                                                           | Hosp. Municipal Dr. Waldemar Tebaldi                                                                                     | Instituto Adolfo Lutz Strategic Laboratory                                                                               | Claudio Tavares Sacchi, Karoline Rodrigues Campos, Ariadne Ferreira Amarante, Marlon Benedito Nascimento Santos, Alex Domingos Reis, Adriano Abbud, Adriana Bugno                                                                                                                                                                                                                                                                                                                                                                                                                             |  |
| EPI_ISL_14571442                                                                                                                                                                                                                                                                                                                                                                                                                                                                                                                                                                                                                                                                                           | Instituto de Infectologia Emilio Ribas II Baixada Santista                                                               | Instituto Adolfo Lutz Strategic Laboratory                                                                               | Claudio Tavares Sacchi, Karoline Rodrigues Campos, Ariadne Ferreira Amarante, Marlon Benedito Nascimento Santos, Alex Domingos Reis, Adriano Abbud, Adriana Bugno                                                                                                                                                                                                                                                                                                                                                                                                                             |  |
| EPI_ISL_14571444                                                                                                                                                                                                                                                                                                                                                                                                                                                                                                                                                                                                                                                                                           | UBDS DR. Italo Baruffi Castelo Branco                                                                                    | Instituto Adolfo Lutz Strategic Laboratory                                                                               | Claudio Tavares Sacchi, Karoline Rodrigues Campos, Ariadne Ferreira Amarante, Marlon Benedito Nascimento Santos, Alex Domingos Reis, Adriano Abbud, Adriana Bugno                                                                                                                                                                                                                                                                                                                                                                                                                             |  |
| EPI_ISL_14584274, EPI_ISL_14584275, EPI_ISL_14584276, EPI_ISL_14584277, EPI_ISL_14584278, EPI_ISL_14584279, EPI_ISL_14584280, EPI_ISL_14584281, EPI_ISL_14584282, EPI_ISL_14584283, EPI_ISL_14584284, EPI_ISL_14584285, EPI_ISL_14584286, EPI_ISL_14584287, EPI_ISL_14584288, EPI_ISL_14584289, EPI_ISL_14584290, EPI_ISL_14584291, EPI_ISL_14584292, EPI_ISL_14584293, EPI_ISL_14584294, EPI_ISL_14584295, EPI_ISL_14584296, EPI_ISL_14584297, EPI_ISL_14584298, EPI_ISL_14584299, EPI_ISL_14584300, EPI_ISL_14584301, EPI_ISL_14584302, EPI_ISL_14584303, EPI_ISL_14584304, EPI_ISL_14584305, EPI_ISL_14584306, EPI_ISL_14584307, EPI_ISL_14584308, EPI_ISL_14584309, EPI_ISL_14584310, EPI_ISL_14584311 |                                                                                                                          |                                                                                                                          |                                                                                                                                                                                                                                                                                                                                                                                                                                                                                                                                                                                               |  |
| see above                                                                                                                                                                                                                                                                                                                                                                                                                                                                                                                                                                                                                                                                                                  | Laboratorio de Referencia Nacional de Virus Respiratorio. Centro Nacional de Salud Publica. Instituto Nacional de Salud. | Laboratorio de Referencia Nacional de Virus Respiratorio. Centro Nacional de Salud Publica. Instituto Nacional de Salud. | Carlos Padilla Rojas, Veronica Hurtado Vela, Iris Silva Molina, Luren Sevilla Castañeda, Victor Jimenez Vasquez, Orson Mestanza Millones, Luis Barcena Flores, Wendy Lizarraga Olivares, Alicia Nuñez Llanos, Steve Acedo Lazo, Francisco Ascue Oroasco, Kelly Izarra Rojas, Princesa Medrano Alhuay, Karla Vasquez Cajachahua, Estela Huanan Angeles, Jorge Giraldo Chavez, Lilian Huarca Balbin, Lisbet Roxana Inga Angulo, Maria Sandra Villar Saavedra, Henri Bailon Calderon, Lely Solari Zerpa, Gloria Arotinco Garayar. Equipo de vigilancia genómica del Instituto Nacional de Salud. |  |
| EPI_ISL_14586688                                                                                                                                                                                                                                                                                                                                                                                                                                                                                                                                                                                                                                                                                           | Public Health Authority of the Slovak Republic                                                                           | Laboratory of Genomics and Bioinformatics, Comenius University Science Park                                              | Tomáš Szemes, Edita Staroová, Elena Tichá, Lucia Ševíková, Terézia Vrabová, Tatiana Sedláková, Miroslav Böhmer, Jaroslav Budiš, Pavol Mišenko                                                                                                                                                                                                                                                                                                                                                                                                                                                 |  |
| EPI_ISL_14587543, EPI_ISL_14587544, EPI_ISL_14587545, EPI_ISL_14587546, EPI_ISL_14587547, EPI_ISL_14587548, EPI_ISL_14587549, EPI_ISL_14587550, EPI_ISL_14587551                                                                                                                                                                                                                                                                                                                                                                                                                                                                                                                                           | Public Health Agency of Canada, National Microbiology Laboratory                                                         | Public Health Agency of Canada, National Microbiology Laboratory                                                         | Duggan,A., Hole,D., Yadav,C., Knox,N., Tyler,A., Haidl,E., Chapel,M., Domselaar,G.V., Graham,M., Audet,J., Fernando,L., Hagan,M., Safronetz,D., Leung,A., Peters,G., Go,A., Laminman,V., Kaplen,B., Antonation,K., Griffiths,E., Jolly,G., Charest,H., Levade,I. and Fafard,J.                                                                                                                                                                                                                                                                                                                |  |
| EPI_ISL_14594041, EPI_ISL_14594042, EPI_ISL_14594043, EPI_ISL_14594044, EPI_ISL_14594045, EPI_ISL_14594046, EPI_ISL_14594047, EPI_ISL_14594048, EPI_ISL_14594049, EPI_ISL_14594050, EPI_ISL_14594051, EPI_ISL_14594052, EPI_ISL_14594053, EPI_ISL_14594054, EPI_ISL_14594055, EPI_ISL_14594056, EPI_ISL_14594057                                                                                                                                                                                                                                                                                                                                                                                           |                                                                                                                          |                                                                                                                          |                                                                                                                                                                                                                                                                                                                                                                                                                                                                                                                                                                                               |  |
| see above                                                                                                                                                                                                                                                                                                                                                                                                                                                                                                                                                                                                                                                                                                  | Public Health Agency of Canada, National Microbiology Laboratory                                                         | Public Health Agency of Canada, National Microbiology Laboratory                                                         | Duggan,A., Hole,D., Yadav,C., Knox,N., Tyler,A., Haidl,E., Chapel,M., Domselaar,G.V., Graham,M., Audet,J., Fernando,L., Antonation,K., Safronetz,D., Hagan,M., Peters,G., Go,A., Laminman,V., Kaplen,B., Leung,A., Griffiths,E., Jolly,G., Eshaghi,A., Gubbay,J.B., Hasso,M., Marchand-Austin,A., Olsha,R. and Patel,S.N.                                                                                                                                                                                                                                                                     |  |
| EPI_ISL_14615579                                                                                                                                                                                                                                                                                                                                                                                                                                                                                                                                                                                                                                                                                           | RSUPN dr. Cipto Mangunkusumo                                                                                             | National Institute of Health Research and Development                                                                    | Hana Apsari Pawestri, Arie Ardiansyah Nugraha, Fajar Nur Sulistiyohadi, Subangkit, Krisna NA Pangesti, Tze Minn Mak, I Gede Made Wirabrata                                                                                                                                                                                                                                                                                                                                                                                                                                                    |  |
| EPI_ISL_14621526                                                                                                                                                                                                                                                                                                                                                                                                                                                                                                                                                                                                                                                                                           | Virology, APHP Pitie Salpetriere SU                                                                                      | Virology, APHP Pitie Salpetriere SU                                                                                      | Seang,S., Burrel,S., Todesco,E., Leducq,V., Monsel,G., Le Pluart,D., Cordevant,C., Pourcher,V. and Palich,R.                                                                                                                                                                                                                                                                                                                                                                                                                                                                                  |  |
| EPI_ISL_14622055                                                                                                                                                                                                                                                                                                                                                                                                                                                                                                                                                                                                                                                                                           | Instituto de Infectologia Emilio Ribas                                                                                   | Instituto Adolfo Lutz Strategic Laboratory                                                                               | Claudio Tavares Sacchi, Karoline Rodrigues Campos, Ariadne Ferreira Amarante, Marlon Benedito Nascimento Santos, Alex Domingos Reis, Adriano Abbud, Adriana Bugno                                                                                                                                                                                                                                                                                                                                                                                                                             |  |
| EPI_ISL_14622520                                                                                                                                                                                                                                                                                                                                                                                                                                                                                                                                                                                                                                                                                           | UBS Jovaia                                                                                                               | Instituto Adolfo Lutz Strategic Laboratory                                                                               | Claudio Tavares Sacchi, Karoline Rodrigues Campos, Ariadne Ferreira Amarante, Marlon Benedito Nascimento Santos, Alex Domingos Reis, Adriano Abbud, Adriana Bugno                                                                                                                                                                                                                                                                                                                                                                                                                             |  |
| EPI_ISL_14622705                                                                                                                                                                                                                                                                                                                                                                                                                                                                                                                                                                                                                                                                                           | UBS Jardim Santista                                                                                                      | Instituto Adolfo Lutz Strategic Laboratory                                                                               | Claudio Tavares Sacchi, Karoline Rodrigues Campos, Ariadne Ferreira Amarante, Marlon Benedito Nascimento Santos, Alex Domingos Reis, Adriano Abbud, Adriana Bugno                                                                                                                                                                                                                                                                                                                                                                                                                             |  |
| EPI_ISL_14622706                                                                                                                                                                                                                                                                                                                                                                                                                                                                                                                                                                                                                                                                                           | Centro de Referencia Modulo I SAE II Bauru                                                                               | Instituto Adolfo Lutz Strategic Laboratory                                                                               | Claudio Tavares Sacchi, Karoline Rodrigues Campos, Ariadne Ferreira Amarante, Marlon Benedito Nascimento Santos, Alex Domingos Reis, Adriano Abbud, Adriana Bugno                                                                                                                                                                                                                                                                                                                                                                                                                             |  |
| EPI_ISL_14622707                                                                                                                                                                                                                                                                                                                                                                                                                                                                                                                                                                                                                                                                                           | USF Boicucanga I Sao Sebastiao                                                                                           | Instituto Adolfo Lutz Strategic Laboratory                                                                               | Claudio Tavares Sacchi, Karoline Rodrigues Campos, Ariadne Ferreira Amarante, Marlon Benedito Nascimento Santos, Alex Domingos Reis, Adriano Abbud, Adriana Bugno                                                                                                                                                                                                                                                                                                                                                                                                                             |  |
| EPI_ISL_14622913                                                                                                                                                                                                                                                                                                                                                                                                                                                                                                                                                                                                                                                                                           | Secretaria Municipal de Saude de Caxias do Sul                                                                           | Instituto Adolfo Lutz Strategic Laboratory                                                                               | Claudio Tavares Sacchi, Karoline Rodrigues Campos, Ariadne Ferreira Amarante, Marlon Benedito Nascimento Santos, Alex Domingos Reis, Adriano Abbud, Adriana Bugno                                                                                                                                                                                                                                                                                                                                                                                                                             |  |
| EPI_ISL_14622953                                                                                                                                                                                                                                                                                                                                                                                                                                                                                                                                                                                                                                                                                           | Sistema de Vigilancia em Saude Viamao                                                                                    | Instituto Adolfo Lutz Strategic Laboratory                                                                               | Claudio Tavares Sacchi, Karoline Rodrigues Campos, Ariadne Ferreira Amarante, Marlon Benedito Nascimento Santos, Alex Domingos Reis, Adriano Abbud, Adriana Bugno                                                                                                                                                                                                                                                                                                                                                                                                                             |  |
| EPI_ISL_14622960                                                                                                                                                                                                                                                                                                                                                                                                                                                                                                                                                                                                                                                                                           | Vigilancia Epidemiologica Municipal                                                                                      | Instituto Adolfo Lutz Strategic Laboratory                                                                               | Claudio Tavares Sacchi, Karoline Rodrigues Campos, Ariadne Ferreira Amarante, Marlon Benedito Nascimento Santos, Alex Domingos Reis, Adriano Abbud, Adriana Bugno                                                                                                                                                                                                                                                                                                                                                                                                                             |  |
| EPI_ISL_14623175                                                                                                                                                                                                                                                                                                                                                                                                                                                                                                                                                                                                                                                                                           | Centro de Referencia em Especialidades Central Rib Preto                                                                 | Instituto Adolfo Lutz Strategic Laboratory                                                                               | Claudio Tavares Sacchi, Karoline Rodrigues Campos, Ariadne Ferreira Amarante, Marlon Benedito Nascimento Santos, Alex Domingos Reis, Adriano Abbud, Adriana Bugno                                                                                                                                                                                                                                                                                                                                                                                                                             |  |
| EPI_ISL_14623523                                                                                                                                                                                                                                                                                                                                                                                                                                                                                                                                                                                                                                                                                           | Laboratorio Municipal de Piracicaba                                                                                      | Instituto Adolfo Lutz Strategic Laboratory                                                                               | Claudio Tavares Sacchi, Karoline Rodrigues Campos, Ariadne Ferreira Amarante, Marlon Benedito Nascimento Santos, Alex Domingos Reis, Adriano Abbud, Adriana Bugno                                                                                                                                                                                                                                                                                                                                                                                                                             |  |
| EPI_ISL_14623704                                                                                                                                                                                                                                                                                                                                                                                                                                                                                                                                                                                                                                                                                           | Unidade Basica de Saude Esplanada                                                                                        | Instituto Adolfo Lutz Strategic Laboratory                                                                               | Claudio Tavares Sacchi, Karoline Rodrigues Campos, Ariadne Ferreira Amarante, Marlon Benedito Nascimento Santos, Alex Domingos Reis, Adriano                                                                                                                                                                                                                                                                                                                                                                                                                                                  |  |

|                                                                                                                                                                                                                                                                                                                                                                                                                                                                                                                                                                                                                                                                                                                                                                                                                                                                                                                                                                                                                                                                                                                                          |                                                                                                     |                                                                                                                                                                                                                |                                                                                                                                                                    |
|------------------------------------------------------------------------------------------------------------------------------------------------------------------------------------------------------------------------------------------------------------------------------------------------------------------------------------------------------------------------------------------------------------------------------------------------------------------------------------------------------------------------------------------------------------------------------------------------------------------------------------------------------------------------------------------------------------------------------------------------------------------------------------------------------------------------------------------------------------------------------------------------------------------------------------------------------------------------------------------------------------------------------------------------------------------------------------------------------------------------------------------|-----------------------------------------------------------------------------------------------------|----------------------------------------------------------------------------------------------------------------------------------------------------------------------------------------------------------------|--------------------------------------------------------------------------------------------------------------------------------------------------------------------|
| EPI_ISL_14624411                                                                                                                                                                                                                                                                                                                                                                                                                                                                                                                                                                                                                                                                                                                                                                                                                                                                                                                                                                                                                                                                                                                         | Hospital Albert Sabin Atibaia                                                                       | Instituto Adolfo Lutz Strategic Laboratory                                                                                                                                                                     | Claudio Tavares Sacchi, Karoline Rodrigues Campos, Ariadne Ferreira Amarante, Marlon Benedito Nascimento Santos, Alex Domingos Reis, Adriano Abbud, Adriana Bugno  |
| EPI_ISL_14624610                                                                                                                                                                                                                                                                                                                                                                                                                                                                                                                                                                                                                                                                                                                                                                                                                                                                                                                                                                                                                                                                                                                         | USAFA Forte                                                                                         | Instituto Adolfo Lutz Strategic Laboratory                                                                                                                                                                     | Claudio Tavares Sacchi, Karoline Rodrigues Campos, Ariadne Ferreira Amarante, Marlon Benedito Nascimento Santos, Alex Domingos Reis, Adriano Abbud, Adriana Bugno  |
| EPI_ISL_14624698                                                                                                                                                                                                                                                                                                                                                                                                                                                                                                                                                                                                                                                                                                                                                                                                                                                                                                                                                                                                                                                                                                                         | Centro de Referencia em AIDS SECRAIDS                                                               | Instituto Adolfo Lutz Strategic Laboratory                                                                                                                                                                     | Claudio Tavares Sacchi, Karoline Rodrigues Campos, Ariadne Ferreira Amarante, Marlon Benedito Nascimento Santos, Alex Domingos Reis, Adriano Abbud, Adriana Bugno  |
| EPI_ISL_14624832                                                                                                                                                                                                                                                                                                                                                                                                                                                                                                                                                                                                                                                                                                                                                                                                                                                                                                                                                                                                                                                                                                                         | Servico de Vigilancia Epidemiologica e de Zoonoses do Guaruja                                       | Instituto Adolfo Lutz Strategic Laboratory                                                                                                                                                                     | Claudio Tavares Sacchi, Karoline Rodrigues Campos, Ariadne Ferreira Amarante, Marlon Benedito Nascimento Santos, Alex Domingos Reis, Adriano Abbud, Adriana Bugno  |
| EPI_ISL_14624915                                                                                                                                                                                                                                                                                                                                                                                                                                                                                                                                                                                                                                                                                                                                                                                                                                                                                                                                                                                                                                                                                                                         | SMS Aruja                                                                                           | Instituto Adolfo Lutz Strategic Laboratory                                                                                                                                                                     | Claudio Tavares Sacchi, Karoline Rodrigues Campos, Ariadne Ferreira Amarante, Marlon Benedito Nascimento Santos, Alex Domingos Reis, Adriano Abbud, Adriana Bugno  |
| EPI_ISL_14625156                                                                                                                                                                                                                                                                                                                                                                                                                                                                                                                                                                                                                                                                                                                                                                                                                                                                                                                                                                                                                                                                                                                         | Secretaria Municipal de Saude de Suzano                                                             | Instituto Adolfo Lutz Strategic Laboratory                                                                                                                                                                     | Claudio Tavares Sacchi, Karoline Rodrigues Campos, Ariadne Ferreira Amarante, Marlon Benedito Nascimento Santos, Alex Domingos Reis, Adriano Abbud, Adriana Bugno  |
| EPI_ISL_14625157                                                                                                                                                                                                                                                                                                                                                                                                                                                                                                                                                                                                                                                                                                                                                                                                                                                                                                                                                                                                                                                                                                                         | PSF Vila Nossa Senhora de Fatima Fartura                                                            | Instituto Adolfo Lutz Strategic Laboratory                                                                                                                                                                     | Claudio Tavares Sacchi, Karoline Rodrigues Campos, Ariadne Ferreira Amarante, Marlon Benedito Nascimento Santos, Alex Domingos Reis, Adriano Abbud, Adriana Bugno  |
| EPI_ISL_14625190                                                                                                                                                                                                                                                                                                                                                                                                                                                                                                                                                                                                                                                                                                                                                                                                                                                                                                                                                                                                                                                                                                                         | Ambulatorio de Atendimentoode DST de Guariba                                                        | Instituto Adolfo Lutz Strategic Laboratory                                                                                                                                                                     | Claudio Tavares Sacchi, Karoline Rodrigues Campos, Ariadne Ferreira Amarante, Marlon Benedito Nascimento Santos, Alex Domingos Reis, Adriano Abbud, Adriana Bugno  |
| EPI_ISL_14625230                                                                                                                                                                                                                                                                                                                                                                                                                                                                                                                                                                                                                                                                                                                                                                                                                                                                                                                                                                                                                                                                                                                         | UBS Centro Clair Aparecida Pavan                                                                    | Instituto Adolfo Lutz Strategic Laboratory                                                                                                                                                                     | Claudio Tavares Sacchi, Karoline Rodrigues Campos, Ariadne Ferreira Amarante, Marlon Benedito Nascimento Santos, Alex Domingos Reis, Adriano Abbud, Adriana Bugno  |
| EPI_ISL_14625256                                                                                                                                                                                                                                                                                                                                                                                                                                                                                                                                                                                                                                                                                                                                                                                                                                                                                                                                                                                                                                                                                                                         | UMS Campina do Siqueira                                                                             | Instituto Adolfo Lutz Strategic Laboratory                                                                                                                                                                     | Claudio Tavares Sacchi, Karoline Rodrigues Campos, Ariadne Ferreira Amarante, Marlon Benedito Nascimento Santos, Alex Domingos Reis, Adriano Abbud, Adriana Bugno  |
| EPI_ISL_14625282                                                                                                                                                                                                                                                                                                                                                                                                                                                                                                                                                                                                                                                                                                                                                                                                                                                                                                                                                                                                                                                                                                                         | Hospital Edmundo Vasconcelos                                                                        | Instituto Adolfo Lutz Strategic Laboratory                                                                                                                                                                     | Claudio Tavares Sacchi, Karoline Rodrigues Campos, Ariadne Ferreira Amarante, Marlon Benedito Nascimento Santos, Alex Domingos Reis, Adriano Abbud, Adriana Bugno  |
| EPI_ISL_14666780                                                                                                                                                                                                                                                                                                                                                                                                                                                                                                                                                                                                                                                                                                                                                                                                                                                                                                                                                                                                                                                                                                                         | Public Health Authority of the Slovak Republic                                                      | Laboratory of Genomics and Bioinformatics, Comenius University Science Park                                                                                                                                    | Tomáš Szemes, Edita Staroová, Elena Tichá, Lucia Ševíková, Terézia Vrabová, Tatiana Sedláková, Miroslav Böhmer, Jaroslav Budiš, Pavol Mišenko                      |
| EPI_ISL_14676265                                                                                                                                                                                                                                                                                                                                                                                                                                                                                                                                                                                                                                                                                                                                                                                                                                                                                                                                                                                                                                                                                                                         | Centro de Desenvolvimento Científico e Tecnológico (CDCT)/CEVS/SES-RS                               | Centro de Desenvolvimento Científico e Tecnológico (CDCT)/CEVS/SES-RS                                                                                                                                          | Richard Steiner Salvato, Regina Bones Barcellos, Fernanda Marques Godinho                                                                                          |
| EPI_ISL_14707250                                                                                                                                                                                                                                                                                                                                                                                                                                                                                                                                                                                                                                                                                                                                                                                                                                                                                                                                                                                                                                                                                                                         | Charite Universitätsmedizin Berlin, Institut fur Virologie, Charitéplatz 1, 10117 Berlin, Germany   | Charite Universitätsmedizin Berlin, Institut fur Virologie, Charitéplatz 1, 10117 Berlin, Germany                                                                                                              | Julia Schneider, Victor M Corman, Terry C Jones, Christian Drosten                                                                                                 |
| EPI_ISL_14721255, EPI_ISL_14721256, EPI_ISL_14721258, EPI_ISL_14721259, EPI_ISL_14721260, EPI_ISL_14721261, EPI_ISL_14721262, EPI_ISL_14721263, EPI_ISL_14721264, EPI_ISL_14721265                                                                                                                                                                                                                                                                                                                                                                                                                                                                                                                                                                                                                                                                                                                                                                                                                                                                                                                                                       | National Public Health Laboratory, National Centre for Infectious Diseases                          | National Public Health Laboratory, National Centre for Infectious Diseases                                                                                                                                     | Yichen Ding, Benny Yeo, Daniel Lim, Zhenyang Zhou, Royce Ang, Samuel Loo, Lin Cui, Raymond Tzer Pin Lin                                                            |
| EPI_ISL_14736400, EPI_ISL_14736402, EPI_ISL_14736403                                                                                                                                                                                                                                                                                                                                                                                                                                                                                                                                                                                                                                                                                                                                                                                                                                                                                                                                                                                                                                                                                     | California Department of Public Health                                                              | California Department of Public Health                                                                                                                                                                         | Viral and Rickettsial Disease Laboratory                                                                                                                           |
| EPI_ISL_14752090, EPI_ISL_14752091, EPI_ISL_14752093, EPI_ISL_14752094, EPI_ISL_14752096                                                                                                                                                                                                                                                                                                                                                                                                                                                                                                                                                                                                                                                                                                                                                                                                                                                                                                                                                                                                                                                 | Environmental, Agricultural, and Occupational Health, University of Nebraska Medical Center         | Environmental, Agricultural, and Occupational Health, University of Nebraska Medical Center                                                                                                                    | Tegomoh,B., Cross,S.T., Chapman,R.C., Bernhard,K., McCutchen,E.L., Fauver,J.R., Pratt,C.B., Warden,D.E., Iwen,P.C., Donahue,M. and Wiley,M.R.                      |
| EPI_ISL_14752098, EPI_ISL_14752100, EPI_ISL_14752106, EPI_ISL_14752108, EPI_ISL_14752109, EPI_ISL_14752111, EPI_ISL_14752113, EPI_ISL_14752124, EPI_ISL_14752126, EPI_ISL_14752127, EPI_ISL_14752128, EPI_ISL_14752129, EPI_ISL_14752130, EPI_ISL_14752131, EPI_ISL_14752132, EPI_ISL_14752133, EPI_ISL_14752145, EPI_ISL_14752146, EPI_ISL_14752148, EPI_ISL_14752156, EPI_ISL_14752165, EPI_ISL_14752167, EPI_ISL_14752169, EPI_ISL_14752173, EPI_ISL_14752177, EPI_ISL_14752178, EPI_ISL_14752180, EPI_ISL_14752182, EPI_ISL_14752186, EPI_ISL_14752189, EPI_ISL_14752191, EPI_ISL_14752193, EPI_ISL_14752195, EPI_ISL_14752197, EPI_ISL_14752201, EPI_ISL_14752202, EPI_ISL_14752204, EPI_ISL_14752206, EPI_ISL_14752208, EPI_ISL_14752210, EPI_ISL_14752211, EPI_ISL_14752212, EPI_ISL_14752213, EPI_ISL_14752216, EPI_ISL_14752218, EPI_ISL_14752219, EPI_ISL_14752220, EPI_ISL_14752222, EPI_ISL_14752224, EPI_ISL_14752227, EPI_ISL_14752229, EPI_ISL_14752231, EPI_ISL_14752233, EPI_ISL_14752234, EPI_ISL_14752238, EPI_ISL_14752240, EPI_ISL_14752242, EPI_ISL_14752244, EPI_ISL_14752248, EPI_ISL_14752249, EPI_ISL_14752255 | Department of Infectious Diseases, National Institute of Health Doutor Ricardo Jorge (INSA)         | Isidro,J., Borges,V., Pinto,M., Sobral,D., Santos,J., Nunes,A., Mixao,V., Ferreira,R., Santos,D., Duarte,S., Vieira,L., Borrego,M.J., Nuncio,S., Lopes de Carvalho,I., Pelerito,A., Cordeiro,R. and Gomes,J.P. |                                                                                                                                                                    |
| see above                                                                                                                                                                                                                                                                                                                                                                                                                                                                                                                                                                                                                                                                                                                                                                                                                                                                                                                                                                                                                                                                                                                                | Department of Infectious Diseases, National Institute of Health Doutor Ricardo Jorge (INSA)         | Department of Infectious Diseases, National Institute of Health Doutor Ricardo Jorge (INSA)                                                                                                                    | Grove,N., Osman,K.L., Lewandowski,K.S., Carter,D.P., Pullan,S.T., Myers,R., Vipond,R. and Chand,M.                                                                 |
| EPI_ISL_14752284                                                                                                                                                                                                                                                                                                                                                                                                                                                                                                                                                                                                                                                                                                                                                                                                                                                                                                                                                                                                                                                                                                                         | Research and Evaluation, UKHSA                                                                      | Research and Evaluation, UKHSA                                                                                                                                                                                 | Groves,N., Osman,K.L., Lewandowski,K.S., Carter,D.P., Pullan,S.T., Myers,R., Vipond,R. and Chand,M.                                                                |
| EPI_ISL_14752290, EPI_ISL_14752291                                                                                                                                                                                                                                                                                                                                                                                                                                                                                                                                                                                                                                                                                                                                                                                                                                                                                                                                                                                                                                                                                                       | Research and Evaluation, UKHSA                                                                      | Research and Evaluation, UKHSA                                                                                                                                                                                 |                                                                                                                                                                    |
| EPI_ISL_14752293                                                                                                                                                                                                                                                                                                                                                                                                                                                                                                                                                                                                                                                                                                                                                                                                                                                                                                                                                                                                                                                                                                                         | Medical Microbiology & Infection Prevention, Amsterdam Medical Centres location AMC                 | Medical Microbiology & Infection Prevention, Amsterdam Medical Centres location AMC                                                                                                                            | Welkers,M., Jonges,M., de Regt,M., Ooijevaar,R. and Wagemakers,A.                                                                                                  |
| EPI_ISL_14772317                                                                                                                                                                                                                                                                                                                                                                                                                                                                                                                                                                                                                                                                                                                                                                                                                                                                                                                                                                                                                                                                                                                         | Policlinica Jacare Wilson Federzoni Cabreuva                                                        | Instituto Adolfo Lutz Strategic Laboratory                                                                                                                                                                     | Claudio Tavares Sacchi, Karoline Rodrigues Campos, Ariadne Ferreira Amarante, Marlon Benedito Nascimento Santos, Alex Domingos Reis, Adriano Abbud, Adriana Bugno  |
| EPI_ISL_14772318                                                                                                                                                                                                                                                                                                                                                                                                                                                                                                                                                                                                                                                                                                                                                                                                                                                                                                                                                                                                                                                                                                                         | Secretaria Municipal de Saude de Sertaozinho                                                        | Instituto Adolfo Lutz Strategic Laboratory                                                                                                                                                                     | Claudio Tavares Sacchi, Karoline Rodrigues Campos, Ariadne Ferreira Amarante, Marlon Benedito Nascimento Santos, Alex Domingos Reis, Adriano Abbud, Adriana Bugno  |
| EPI_ISL_14772912                                                                                                                                                                                                                                                                                                                                                                                                                                                                                                                                                                                                                                                                                                                                                                                                                                                                                                                                                                                                                                                                                                                         | USF Jardim Oratorio                                                                                 | Instituto Adolfo Lutz Strategic Laboratory                                                                                                                                                                     | Claudio Tavares Sacchi, Karoline Rodrigues Campos, Ariadne Ferreira Amarante, Marlon Benedito Nascimento Santos, Alex Domingos Reis, Adriano Abbud, Adriana Bugno  |
| EPI_ISL_14772913                                                                                                                                                                                                                                                                                                                                                                                                                                                                                                                                                                                                                                                                                                                                                                                                                                                                                                                                                                                                                                                                                                                         | Vigilancia Epidemiologica Jardinopolis - SP                                                         | Instituto Adolfo Lutz Strategic Laboratory                                                                                                                                                                     | Claudio Tavares Sacchi, Karoline Rodrigues Campos, Ariadne Ferreira Amarante, Marlon Benedito Nascimento Santos, Alex Domingos Reis, Adriano Abbud, Adriana Bugno  |
| EPI_ISL_14772914                                                                                                                                                                                                                                                                                                                                                                                                                                                                                                                                                                                                                                                                                                                                                                                                                                                                                                                                                                                                                                                                                                                         | Pronto Atendimento Infantil e entral de Quimioterapia SJrpreto                                      | Instituto Adolfo Lutz Strategic Laboratory                                                                                                                                                                     | Claudio Tavares Sacchi, Karoline Rodrigues Campos, Ariadne Ferreira Amarante, Marlon Benedito Nascimento Santos, Alex Domingos Reis, Adriano Abbud, Adriana Bugno  |
| EPI_ISL_14773001                                                                                                                                                                                                                                                                                                                                                                                                                                                                                                                                                                                                                                                                                                                                                                                                                                                                                                                                                                                                                                                                                                                         | CEDIC CTA                                                                                           | Instituto Adolfo Lutz Strategic Laboratory                                                                                                                                                                     | Claudio Tavares Sacchi, Karoline Rodrigues Campos, Ariadne Ferreira Amarante, Marlon Benedito Nascimento Santos, Alex Domingos Reis, Adriano Abbud, Adriana Bugno  |
| EPI_ISL_14783237                                                                                                                                                                                                                                                                                                                                                                                                                                                                                                                                                                                                                                                                                                                                                                                                                                                                                                                                                                                                                                                                                                                         | Sicilian Regional Laboratory - AOUP "P. Giaccone" - University of Palermo                           | Sicilian Regional Laboratory - AOUP "P. Giaccone" - University of Palermo                                                                                                                                      | Fabio Tramuto, Carmelo Massimo Maida, Giulia Randazzo, Valeria Guzzetta, Walter Mazzucco, Giorgio Graziano, Vincenzo Restivo, Claudio Costantino, Francesco Vitale |
| EPI_ISL_14786290                                                                                                                                                                                                                                                                                                                                                                                                                                                                                                                                                                                                                                                                                                                                                                                                                                                                                                                                                                                                                                                                                                                         | IRCCS Sacro Cuore Don Calabria Hospital, Department of Infectious, Tropical Diseases & Microbiology | Department of Infectious, Tropical Diseases & Microbiology,IRCCS Sacro Cuore Don Calabria Hospital                                                                                                             | Michela Deiana, Antonio Mori, Concetta Castilletti, Chiara Piubelli, Denise Lavezzari, Elena Pomari                                                                |
| EPI_ISL_14786346                                                                                                                                                                                                                                                                                                                                                                                                                                                                                                                                                                                                                                                                                                                                                                                                                                                                                                                                                                                                                                                                                                                         | IRCCS Sacro Cuore Don Calabria Hospital, Department of Infectious, Tropical Diseases & Microbiology | IRCCS Sacro Cuore Don Calabria Hospital, Department of Infectious, Tropical Diseases & Microbiology                                                                                                            | Michela Deiana, Antonio Mori, Concetta Castilletti, Chiara Piubelli, Denise Lavezzari, Elena Pomari                                                                |
| EPI_ISL_14793992, EPI_ISL_14795058, EPI_ISL_14795084, EPI_ISL_14795085                                                                                                                                                                                                                                                                                                                                                                                                                                                                                                                                                                                                                                                                                                                                                                                                                                                                                                                                                                                                                                                                   | Erasmus Medical Center Department of Virology                                                       | Erasmus Medical Center Department of Virology                                                                                                                                                                  | Bas Oude Munnink, Leonard Schuele, Marjan Boter, Babette Weller, Babs Verstrepen, Richard Molenkamp, Janette Rahamat-Langendoen, Reina Sikkema, Marion Koopmans    |
| EPI_ISL_14804638, EPI_ISL_14804639, EPI_ISL_14804640, EPI_ISL_14804641,                                                                                                                                                                                                                                                                                                                                                                                                                                                                                                                                                                                                                                                                                                                                                                                                                                                                                                                                                                                                                                                                  | Nebraska Public Health Laboratory                                                                   | University of Nebraska Medical Center, Oklahoma Pathogen Genomics Consortium                                                                                                                                   | Chapman,R.C., Bernhard,K., McCutchen,E.L., Fauver,J.R., O'Dell,J.X., Mannell,M., Wiley,M.R., Cross,S.T.                                                            |

|                                                                                                                                                                                                                                                                                                                                                                                                                                                                                                                                                                                                                                                                                                                                                                                                                                                                                                                                                                                                                                                                                                                                                                                                                                                                                                                                                                                                                                                                                                                                                                                                                                                                                                                                                                                                                                                      |                                                                                                                               |                                                                                                                               |                                                                                                                                                                                                                                                                                                                                                                                                                                             |
|------------------------------------------------------------------------------------------------------------------------------------------------------------------------------------------------------------------------------------------------------------------------------------------------------------------------------------------------------------------------------------------------------------------------------------------------------------------------------------------------------------------------------------------------------------------------------------------------------------------------------------------------------------------------------------------------------------------------------------------------------------------------------------------------------------------------------------------------------------------------------------------------------------------------------------------------------------------------------------------------------------------------------------------------------------------------------------------------------------------------------------------------------------------------------------------------------------------------------------------------------------------------------------------------------------------------------------------------------------------------------------------------------------------------------------------------------------------------------------------------------------------------------------------------------------------------------------------------------------------------------------------------------------------------------------------------------------------------------------------------------------------------------------------------------------------------------------------------------|-------------------------------------------------------------------------------------------------------------------------------|-------------------------------------------------------------------------------------------------------------------------------|---------------------------------------------------------------------------------------------------------------------------------------------------------------------------------------------------------------------------------------------------------------------------------------------------------------------------------------------------------------------------------------------------------------------------------------------|
| EPI_ISL_14804642, EPI_ISL_14804643, EPI_ISL_14804644, EPI_ISL_14804645, EPI_ISL_14804646, EPI_ISL_14804647                                                                                                                                                                                                                                                                                                                                                                                                                                                                                                                                                                                                                                                                                                                                                                                                                                                                                                                                                                                                                                                                                                                                                                                                                                                                                                                                                                                                                                                                                                                                                                                                                                                                                                                                           |                                                                                                                               |                                                                                                                               |                                                                                                                                                                                                                                                                                                                                                                                                                                             |
| EPI_ISL_14809096                                                                                                                                                                                                                                                                                                                                                                                                                                                                                                                                                                                                                                                                                                                                                                                                                                                                                                                                                                                                                                                                                                                                                                                                                                                                                                                                                                                                                                                                                                                                                                                                                                                                                                                                                                                                                                     | AMA Capao Redondo                                                                                                             | Instituto Adolfo Lutz Strategic Laboratory                                                                                    | Claudio Tavares Sacchi, Karoline Rodrigues Campos, Ariadne Ferreira Amarante, Marlon Benedito Nascimento Santos, Alex Domingos Reis, Adriano Abbud, Adriana Bugno                                                                                                                                                                                                                                                                           |
| EPI_ISL_14809097                                                                                                                                                                                                                                                                                                                                                                                                                                                                                                                                                                                                                                                                                                                                                                                                                                                                                                                                                                                                                                                                                                                                                                                                                                                                                                                                                                                                                                                                                                                                                                                                                                                                                                                                                                                                                                     | Pronto Socorro Municipal de Taubate                                                                                           | Instituto Adolfo Lutz Strategic Laboratory                                                                                    | Claudio Tavares Sacchi, Karoline Rodrigues Campos, Ariadne Ferreira Amarante, Marlon Benedito Nascimento Santos, Alex Domingos Reis, Adriano Abbud, Adriana Bugno                                                                                                                                                                                                                                                                           |
| EPI_ISL_14809098                                                                                                                                                                                                                                                                                                                                                                                                                                                                                                                                                                                                                                                                                                                                                                                                                                                                                                                                                                                                                                                                                                                                                                                                                                                                                                                                                                                                                                                                                                                                                                                                                                                                                                                                                                                                                                     | Laboratorio Municipal de Piracicaba                                                                                           | Instituto Adolfo Lutz Strategic Laboratory                                                                                    | Claudio Tavares Sacchi, Karoline Rodrigues Campos, Ariadne Ferreira Amarante, Marlon Benedito Nascimento Santos, Alex Domingos Reis, Adriano Abbud, Adriana Bugno                                                                                                                                                                                                                                                                           |
| EPI_ISL_14809099                                                                                                                                                                                                                                                                                                                                                                                                                                                                                                                                                                                                                                                                                                                                                                                                                                                                                                                                                                                                                                                                                                                                                                                                                                                                                                                                                                                                                                                                                                                                                                                                                                                                                                                                                                                                                                     | Centro de Saude Gabriel de Lara                                                                                               | Instituto Adolfo Lutz Strategic Laboratory                                                                                    | Claudio Tavares Sacchi, Karoline Rodrigues Campos, Ariadne Ferreira Amarante, Marlon Benedito Nascimento Santos, Alex Domingos Reis, Adriano Abbud, Adriana Bugno                                                                                                                                                                                                                                                                           |
| EPI_ISL_14809100                                                                                                                                                                                                                                                                                                                                                                                                                                                                                                                                                                                                                                                                                                                                                                                                                                                                                                                                                                                                                                                                                                                                                                                                                                                                                                                                                                                                                                                                                                                                                                                                                                                                                                                                                                                                                                     | Secretaria Municipal da Saude de Joanopolis                                                                                   | Instituto Adolfo Lutz Strategic Laboratory                                                                                    | Claudio Tavares Sacchi, Karoline Rodrigues Campos, Ariadne Ferreira Amarante, Marlon Benedito Nascimento Santos, Alex Domingos Reis, Adriano Abbud, Adriana Bugno                                                                                                                                                                                                                                                                           |
| EPI_ISL_14810370, EPI_ISL_14810404, EPI_ISL_14810405, EPI_ISL_14810406, EPI_ISL_14810407                                                                                                                                                                                                                                                                                                                                                                                                                                                                                                                                                                                                                                                                                                                                                                                                                                                                                                                                                                                                                                                                                                                                                                                                                                                                                                                                                                                                                                                                                                                                                                                                                                                                                                                                                             | Erasmus Medical Center Department of Virology                                                                                 | Erasmus Medical Center Department of Virology                                                                                 | Leonard Schuele, Bas Oude Munnink, Marjan Boter, Babette Weller, Babs Verstrepen, Richard Molenkamp, Janette Rahamat-Langendoen, Reina Sikkema, Marion Koopmans                                                                                                                                                                                                                                                                             |
| EPI_ISL_14818585, EPI_ISL_14818587, EPI_ISL_14818589, EPI_ISL_14818590, EPI_ISL_14818595, EPI_ISL_14818600, EPI_ISL_14818602, EPI_ISL_14818603, EPI_ISL_14818604, EPI_ISL_14818611, EPI_ISL_14818612, EPI_ISL_14818615                                                                                                                                                                                                                                                                                                                                                                                                                                                                                                                                                                                                                                                                                                                                                                                                                                                                                                                                                                                                                                                                                                                                                                                                                                                                                                                                                                                                                                                                                                                                                                                                                               |                                                                                                                               |                                                                                                                               |                                                                                                                                                                                                                                                                                                                                                                                                                                             |
| see above                                                                                                                                                                                                                                                                                                                                                                                                                                                                                                                                                                                                                                                                                                                                                                                                                                                                                                                                                                                                                                                                                                                                                                                                                                                                                                                                                                                                                                                                                                                                                                                                                                                                                                                                                                                                                                            | Los Angeles County Public Health Laboratories                                                                                 | Los Angeles County Public Health Laboratories                                                                                 | P. Hemarajata et al.                                                                                                                                                                                                                                                                                                                                                                                                                        |
| EPI_ISL_14818783, EPI_ISL_14818784, EPI_ISL_14818785, EPI_ISL_14818786, EPI_ISL_14818787, EPI_ISL_14818788, EPI_ISL_14818789, EPI_ISL_14818790, EPI_ISL_14818791, EPI_ISL_14818792, EPI_ISL_14818793, EPI_ISL_14818794, EPI_ISL_14818795, EPI_ISL_14818796, EPI_ISL_14818797, EPI_ISL_14818798, EPI_ISL_14818799, EPI_ISL_14818800, EPI_ISL_14818801, EPI_ISL_14818802, EPI_ISL_14818803, EPI_ISL_14818804, EPI_ISL_14818805, EPI_ISL_14818806, EPI_ISL_14818807, EPI_ISL_14818808, EPI_ISL_14818809, EPI_ISL_14818810, EPI_ISL_14818811, EPI_ISL_14818812, EPI_ISL_14818813, EPI_ISL_14818814, EPI_ISL_14818815, EPI_ISL_14818816, EPI_ISL_14818817, EPI_ISL_14818818, EPI_ISL_14818819, EPI_ISL_14818820, EPI_ISL_14818821, EPI_ISL_14818822                                                                                                                                                                                                                                                                                                                                                                                                                                                                                                                                                                                                                                                                                                                                                                                                                                                                                                                                                                                                                                                                                                       |                                                                                                                               |                                                                                                                               |                                                                                                                                                                                                                                                                                                                                                                                                                                             |
| see above                                                                                                                                                                                                                                                                                                                                                                                                                                                                                                                                                                                                                                                                                                                                                                                                                                                                                                                                                                                                                                                                                                                                                                                                                                                                                                                                                                                                                                                                                                                                                                                                                                                                                                                                                                                                                                            | Laboratorio de Referencia Nacional de Virus Inmunoprevenibles. Centro Nacional de Salud Publica. Instituto Nacional de Salud. | Laboratorio de Referencia Nacional de Virus Inmunoprevenibles. Centro Nacional de Salud Publica. Instituto Nacional de Salud. | Carlos Padilla Rojas, Veronica Hurtado Vela, Iris Silva Molina, Luren Sevilla Castañeda, Victor Jimenez Vasquez, Luis Barcena Flores, Alicia Nuñez Llanos, Kelly Izarra Rojas, Karla Vasquez Cajachahua, Estela Huaman Angeles, Jorge Giraldo Chavez, Lilian Huarca Balbin, Maria Sandra Villar Saavedra, Henri Bailon Calderon, Lely Solari Zerpa, Gloria Arotinco Garayar. Equipo de vigilancia genómica del Instituto Nacional de Salud. |
| EPI_ISL_14863048, EPI_ISL_14863050, EPI_ISL_14863051, EPI_ISL_14863052, EPI_ISL_14863053, EPI_ISL_14863054, EPI_ISL_14863055, EPI_ISL_14863056, EPI_ISL_14863057, EPI_ISL_14863058, EPI_ISL_14863059, EPI_ISL_14863060, EPI_ISL_14863061, EPI_ISL_14863062, EPI_ISL_14863064, EPI_ISL_14863065, EPI_ISL_14863066                                                                                                                                                                                                                                                                                                                                                                                                                                                                                                                                                                                                                                                                                                                                                                                                                                                                                                                                                                                                                                                                                                                                                                                                                                                                                                                                                                                                                                                                                                                                     |                                                                                                                               |                                                                                                                               |                                                                                                                                                                                                                                                                                                                                                                                                                                             |
| see above                                                                                                                                                                                                                                                                                                                                                                                                                                                                                                                                                                                                                                                                                                                                                                                                                                                                                                                                                                                                                                                                                                                                                                                                                                                                                                                                                                                                                                                                                                                                                                                                                                                                                                                                                                                                                                            | MEPHI, IHU - Mediterranee Infection                                                                                           | MEPHI, IHU - Mediterranee Infection                                                                                           | Colson,P.                                                                                                                                                                                                                                                                                                                                                                                                                                   |
| EPI_ISL_14865785                                                                                                                                                                                                                                                                                                                                                                                                                                                                                                                                                                                                                                                                                                                                                                                                                                                                                                                                                                                                                                                                                                                                                                                                                                                                                                                                                                                                                                                                                                                                                                                                                                                                                                                                                                                                                                     | UBS J COPA                                                                                                                    | Instituto Adolfo Lutz Strategic Laboratory                                                                                    | Claudio Tavares Sacchi, Karoline Rodrigues Campos, Ariadne Ferreira Amarante, Marlon Benedito Nascimento Santos, Alex Domingos Reis, Adriano Abbud, Adriana Bugno                                                                                                                                                                                                                                                                           |
| EPI_ISL_14866481                                                                                                                                                                                                                                                                                                                                                                                                                                                                                                                                                                                                                                                                                                                                                                                                                                                                                                                                                                                                                                                                                                                                                                                                                                                                                                                                                                                                                                                                                                                                                                                                                                                                                                                                                                                                                                     | PR S da Familia Unidade de Saude Adalberto Rocha                                                                              | Instituto Adolfo Lutz Strategic Laboratory                                                                                    | Claudio Tavares Sacchi, Karoline Rodrigues Campos, Ariadne Ferreira Amarante, Marlon Benedito Nascimento Santos, Alex Domingos Reis, Adriano Abbud, Adriana Bugno                                                                                                                                                                                                                                                                           |
| EPI_ISL_14866750                                                                                                                                                                                                                                                                                                                                                                                                                                                                                                                                                                                                                                                                                                                                                                                                                                                                                                                                                                                                                                                                                                                                                                                                                                                                                                                                                                                                                                                                                                                                                                                                                                                                                                                                                                                                                                     | Unidade de Pronto Atendimento UPA SUL Caraguatatuba                                                                           | Instituto Adolfo Lutz Strategic Laboratory                                                                                    | Claudio Tavares Sacchi, Karoline Rodrigues Campos, Ariadne Ferreira Amarante, Marlon Benedito Nascimento Santos, Alex Domingos Reis, Adriano Abbud, Adriana Bugno                                                                                                                                                                                                                                                                           |
| EPI_ISL_14866751                                                                                                                                                                                                                                                                                                                                                                                                                                                                                                                                                                                                                                                                                                                                                                                                                                                                                                                                                                                                                                                                                                                                                                                                                                                                                                                                                                                                                                                                                                                                                                                                                                                                                                                                                                                                                                     | Pronto Socorro da Vila Dirce                                                                                                  | Instituto Adolfo Lutz Strategic Laboratory                                                                                    | Claudio Tavares Sacchi, Karoline Rodrigues Campos, Ariadne Ferreira Amarante, Marlon Benedito Nascimento Santos, Alex Domingos Reis, Adriano Abbud, Adriana Bugno                                                                                                                                                                                                                                                                           |
| EPI_ISL_14866752                                                                                                                                                                                                                                                                                                                                                                                                                                                                                                                                                                                                                                                                                                                                                                                                                                                                                                                                                                                                                                                                                                                                                                                                                                                                                                                                                                                                                                                                                                                                                                                                                                                                                                                                                                                                                                     | Secretaria Municipal de Saude Sao Carlos                                                                                      | Instituto Adolfo Lutz Strategic Laboratory                                                                                    | Claudio Tavares Sacchi, Karoline Rodrigues Campos, Ariadne Ferreira Amarante, Marlon Benedito Nascimento Santos, Alex Domingos Reis, Adriano Abbud, Adriana Bugno                                                                                                                                                                                                                                                                           |
| EPI_ISL_14887952, EPI_ISL_14887955, EPI_ISL_14887956, EPI_ISL_14887957, EPI_ISL_14887958, EPI_ISL_14887960, EPI_ISL_14887961, EPI_ISL_14887962, EPI_ISL_14887963, EPI_ISL_14887966, EPI_ISL_14887968, EPI_ISL_14887969, EPI_ISL_14887971, EPI_ISL_14887972                                                                                                                                                                                                                                                                                                                                                                                                                                                                                                                                                                                                                                                                                                                                                                                                                                                                                                                                                                                                                                                                                                                                                                                                                                                                                                                                                                                                                                                                                                                                                                                           |                                                                                                                               |                                                                                                                               |                                                                                                                                                                                                                                                                                                                                                                                                                                             |
| see above                                                                                                                                                                                                                                                                                                                                                                                                                                                                                                                                                                                                                                                                                                                                                                                                                                                                                                                                                                                                                                                                                                                                                                                                                                                                                                                                                                                                                                                                                                                                                                                                                                                                                                                                                                                                                                            | Viral Genotyping Reference Laboratory, Royal Infirmary of Edinburgh                                                           | Viral Genotyping Reference Laboratory, Royal Infirmary of Edinburgh                                                           | McHugh,M.P., Maloney,D., Parker,A., Mathers,K., Dewar,R., Kenicer,J., Cotton,S., Wild,J. and Templeton,K.E.                                                                                                                                                                                                                                                                                                                                 |
| EPI_ISL_14910858                                                                                                                                                                                                                                                                                                                                                                                                                                                                                                                                                                                                                                                                                                                                                                                                                                                                                                                                                                                                                                                                                                                                                                                                                                                                                                                                                                                                                                                                                                                                                                                                                                                                                                                                                                                                                                     | Laboratorio de Investigacion Molecular (UNIMOL), Universidad de Cartagena                                                     | Laboratorio de Investigacion Molecular (UNIMOL), Universidad de Cartagena                                                     | Loyola,S., Fernandez-Ruiz,M., Torres-Pacheco,J., Franco-Munoz,C., Laiton-Donato,K., Ruiz-Moreno,H., Mercado-Reyes,M. and Gomez-Camargo,D.                                                                                                                                                                                                                                                                                                   |
| EPI_ISL_14910886                                                                                                                                                                                                                                                                                                                                                                                                                                                                                                                                                                                                                                                                                                                                                                                                                                                                                                                                                                                                                                                                                                                                                                                                                                                                                                                                                                                                                                                                                                                                                                                                                                                                                                                                                                                                                                     | Research and Evaluation, UKHSA                                                                                                | Research and Evaluation, UKHSA                                                                                                | Burton,J., Easterbrook,L., Drinkwater,E., Groves,N., Osman,K.L., Lewandowski,K.S., Carter,D., Pullan,S.T., Myers,R., Vipond,R. and Chand,M.                                                                                                                                                                                                                                                                                                 |
| EPI_ISL_14917565, EPI_ISL_14917569, EPI_ISL_14917571, EPI_ISL_14917576, EPI_ISL_14917579, EPI_ISL_14917580, EPI_ISL_14917581, EPI_ISL_14917584, EPI_ISL_14917587                                                                                                                                                                                                                                                                                                                                                                                                                                                                                                                                                                                                                                                                                                                                                                                                                                                                                                                                                                                                                                                                                                                                                                                                                                                                                                                                                                                                                                                                                                                                                                                                                                                                                     | Los Angeles County Public Health Laboratories                                                                                 | Los Angeles County Public Health Laboratories                                                                                 | P. Hemarajata et al.                                                                                                                                                                                                                                                                                                                                                                                                                        |
| EPI_ISL_14934116                                                                                                                                                                                                                                                                                                                                                                                                                                                                                                                                                                                                                                                                                                                                                                                                                                                                                                                                                                                                                                                                                                                                                                                                                                                                                                                                                                                                                                                                                                                                                                                                                                                                                                                                                                                                                                     | Medical Center of Vienna Center for Virology                                                                                  | Medical University of Vienna Center for Virology                                                                              | Jeremy V. Camp, Monika Redlberger-Fritz, Stephan W. Aberle                                                                                                                                                                                                                                                                                                                                                                                  |
| EPI_ISL_14934140                                                                                                                                                                                                                                                                                                                                                                                                                                                                                                                                                                                                                                                                                                                                                                                                                                                                                                                                                                                                                                                                                                                                                                                                                                                                                                                                                                                                                                                                                                                                                                                                                                                                                                                                                                                                                                     | Center for Virology Medical Unviersity of Vienna                                                                              | Medical University of Vienna Center for Virology                                                                              | Jeremy V. Camp, Monika Redlberger-Fritz, Stephan W. Aberle                                                                                                                                                                                                                                                                                                                                                                                  |
| EPI_ISL_14934382                                                                                                                                                                                                                                                                                                                                                                                                                                                                                                                                                                                                                                                                                                                                                                                                                                                                                                                                                                                                                                                                                                                                                                                                                                                                                                                                                                                                                                                                                                                                                                                                                                                                                                                                                                                                                                     | Medical University of Vienna Center for Virology                                                                              | Medical University of Vienna Center for Virology                                                                              | Jeremy V. Camp, Monika Redlberger-Fritz, Stephan W. Aberle                                                                                                                                                                                                                                                                                                                                                                                  |
| EPI_ISL_14934478                                                                                                                                                                                                                                                                                                                                                                                                                                                                                                                                                                                                                                                                                                                                                                                                                                                                                                                                                                                                                                                                                                                                                                                                                                                                                                                                                                                                                                                                                                                                                                                                                                                                                                                                                                                                                                     | Medical University of Vienna Center for Virology                                                                              | Medical University of Vienna Center for Virology                                                                              | Jeremy V. Camp, Monika Redlberg-Fritz, Stephan W. Aberle                                                                                                                                                                                                                                                                                                                                                                                    |
| EPI_ISL_14934496, EPI_ISL_14934497, EPI_ISL_14934498, EPI_ISL_14934499, EPI_ISL_14934500, EPI_ISL_14934501, EPI_ISL_14934502, EPI_ISL_14934503, EPI_ISL_14934508, EPI_ISL_14934509, EPI_ISL_14934510, EPI_ISL_14934511, EPI_ISL_14934512, EPI_ISL_14934513, EPI_ISL_14934514, EPI_ISL_14934515, EPI_ISL_14934516, EPI_ISL_14934517, EPI_ISL_14934518, EPI_ISL_14934519, EPI_ISL_14934520, EPI_ISL_14934521, EPI_ISL_14934522, EPI_ISL_14934523, EPI_ISL_14934524, EPI_ISL_14934525, EPI_ISL_14934526, EPI_ISL_14934527, EPI_ISL_14934528, EPI_ISL_14934529, EPI_ISL_14934530, EPI_ISL_14934531, EPI_ISL_14934532, EPI_ISL_14934533, EPI_ISL_14934534, EPI_ISL_14934535, EPI_ISL_14934536, EPI_ISL_14934537, EPI_ISL_14934538, EPI_ISL_14934539, EPI_ISL_14934540, EPI_ISL_14934541, EPI_ISL_14934542, EPI_ISL_14934543, EPI_ISL_14934544, EPI_ISL_14934545, EPI_ISL_14934546, EPI_ISL_14934547, EPI_ISL_14934548, EPI_ISL_14934549, EPI_ISL_14934550, EPI_ISL_14934551, EPI_ISL_14934552, EPI_ISL_14934553, EPI_ISL_14934554, EPI_ISL_14934555, EPI_ISL_14934556, EPI_ISL_14934557, EPI_ISL_14934558, EPI_ISL_14934559, EPI_ISL_14934560, EPI_ISL_14934561, EPI_ISL_14934562, EPI_ISL_14934563, EPI_ISL_14934564, EPI_ISL_14934565, EPI_ISL_14934566, EPI_ISL_14934567, EPI_ISL_14934568, EPI_ISL_14934569, EPI_ISL_14934570, EPI_ISL_14934571, EPI_ISL_14934572, EPI_ISL_14934573, EPI_ISL_14934574, EPI_ISL_14934575, EPI_ISL_14934576, EPI_ISL_14934578, EPI_ISL_14934579, EPI_ISL_14934580, EPI_ISL_14934581, EPI_ISL_14934582, EPI_ISL_14934583, EPI_ISL_14934584, EPI_ISL_14934585, EPI_ISL_14934586, EPI_ISL_14934587, EPI_ISL_14934588, EPI_ISL_14934589, EPI_ISL_14934608, EPI_ISL_14934610, EPI_ISL_14934611, EPI_ISL_14934612, EPI_ISL_14934613, EPI_ISL_14934614, EPI_ISL_14934615, EPI_ISL_14934616, EPI_ISL_14934617, EPI_ISL_14934619 |                                                                                                                               |                                                                                                                               |                                                                                                                                                                                                                                                                                                                                                                                                                                             |
| see above                                                                                                                                                                                                                                                                                                                                                                                                                                                                                                                                                                                                                                                                                                                                                                                                                                                                                                                                                                                                                                                                                                                                                                                                                                                                                                                                                                                                                                                                                                                                                                                                                                                                                                                                                                                                                                            | Department of Infectious Diseases, National Institute of Health Doutor Ricardo Jorge, Portugal (INSA)                         | Department of Infectious Diseases, National Institute of Health Doutor Ricardo Jorge, Portugal (INSA)                         | Isidro,J., Borges,V., Pinto,M., Sobral,D., Santos,J., Nunes,A., Mixao,V., Ferreira,R., Santos,D., Duarte,S., Vieira,L., Borrego,M.J., Nuncio,S., Lopes de Carvalho,I., Pelerito,A., Cordeiro,R. and Gomes,J.P.                                                                                                                                                                                                                              |
| EPI_ISL_14945299                                                                                                                                                                                                                                                                                                                                                                                                                                                                                                                                                                                                                                                                                                                                                                                                                                                                                                                                                                                                                                                                                                                                                                                                                                                                                                                                                                                                                                                                                                                                                                                                                                                                                                                                                                                                                                     | Department of Microbiology, The University of Hong Kong                                                                       | Department of Microbiology, The University of Hong Kong                                                                       | Kelvin K.W. To, Kwok-Yung Yuen                                                                                                                                                                                                                                                                                                                                                                                                              |
| EPI_ISL_14961089, EPI_ISL_14961090                                                                                                                                                                                                                                                                                                                                                                                                                                                                                                                                                                                                                                                                                                                                                                                                                                                                                                                                                                                                                                                                                                                                                                                                                                                                                                                                                                                                                                                                                                                                                                                                                                                                                                                                                                                                                   | Public Health Authority of the Slovak Republic                                                                                | Laboratory of Genomics and Bioinformatics, Comenius University Science Park                                                   | Tomáš Szemes, Edita Staroová, Elena Tichá, Lucia Ševíková, Terézia Vrabová, Tatiana Sedláková, Miroslav Böhmer, Jaroslav Budiš, Pavol Mišenko                                                                                                                                                                                                                                                                                               |
| EPI_ISL_14962734                                                                                                                                                                                                                                                                                                                                                                                                                                                                                                                                                                                                                                                                                                                                                                                                                                                                                                                                                                                                                                                                                                                                                                                                                                                                                                                                                                                                                                                                                                                                                                                                                                                                                                                                                                                                                                     | Laboratory of Virology, University Hospitals of Geneva                                                                        | Laboratory of Virology, University Hospitals of Geneva                                                                        | Laubscher,F., Chudzinsk,V., Cordey,S., Schibler,M., Kaiser,L. and Renzoni,A.                                                                                                                                                                                                                                                                                                                                                                |
| EPI_ISL_14977301, EPI_ISL_14977305                                                                                                                                                                                                                                                                                                                                                                                                                                                                                                                                                                                                                                                                                                                                                                                                                                                                                                                                                                                                                                                                                                                                                                                                                                                                                                                                                                                                                                                                                                                                                                                                                                                                                                                                                                                                                   | Antioquia, Laboratorio Departamental de Salud Publica de Antioquia                                                            | Antioquia, Laboratorio Departamental de Salud Publica de Antioquia                                                            | Betancur,I.I.B., Velarde-Hoyos,C.-A.C.V., Gomez,R.R.G. and Mercado-Reyes,M.M.R.                                                                                                                                                                                                                                                                                                                                                             |
| EPI_ISL_14977306, EPI_ISL_14977307, EPI_ISL_14977308, EPI_ISL_14977309, EPI_ISL_14977310                                                                                                                                                                                                                                                                                                                                                                                                                                                                                                                                                                                                                                                                                                                                                                                                                                                                                                                                                                                                                                                                                                                                                                                                                                                                                                                                                                                                                                                                                                                                                                                                                                                                                                                                                             | Environmental, Agricultural, and Occupational Health, University of Nebraska Medical Center                                   | Environmental, Agricultural, and Occupational Health, University of Nebraska Medical Center                                   | Tegomoh,B., Cross,S.T., Chapman,R.C., Bernhard,K., McCutchen,E.L., Fauver,J.R., Pratt,C.B., Warden,D.E., Iwen,P.C., Donahue,M. and Wiley,M.R.                                                                                                                                                                                                                                                                                               |
| EPI_ISL_14994740                                                                                                                                                                                                                                                                                                                                                                                                                                                                                                                                                                                                                                                                                                                                                                                                                                                                                                                                                                                                                                                                                                                                                                                                                                                                                                                                                                                                                                                                                                                                                                                                                                                                                                                                                                                                                                     | UBS Vila California Zeilvail Bruscagin                                                                                        | Instituto Adolfo Lutz Strategic Laboratory                                                                                    | Claudio Tavares Sacchi, Karoline Rodrigues Campos, Ariadne Ferreira Amarante, Marlon Benedito Nascimento Santos, Alex Domingos Reis, Adriano                                                                                                                                                                                                                                                                                                |

|                                                                                                                                                                                                                                                                                                                                                      |                                                                                             |                                                                                               |                                                                                                                                                                                                      |
|------------------------------------------------------------------------------------------------------------------------------------------------------------------------------------------------------------------------------------------------------------------------------------------------------------------------------------------------------|---------------------------------------------------------------------------------------------|-----------------------------------------------------------------------------------------------|------------------------------------------------------------------------------------------------------------------------------------------------------------------------------------------------------|
| EPI_ISL_14995206                                                                                                                                                                                                                                                                                                                                     | Pronto Socorro Municipal de Cravinhos                                                       | Instituto Adolfo Lutz Strategic Laboratory                                                    | Abbud, Adriana Bugno                                                                                                                                                                                 |
| EPI_ISL_14995578                                                                                                                                                                                                                                                                                                                                     | Hosp. Municipal de Ilhabela Gov. Mario Covas Jr.                                            | Instituto Adolfo Lutz Strategic Laboratory                                                    | Claudio Tavares Sacchi, Karoline Rodrigues Campos, Ariadne Ferreira Amarante, Marlon Benedito Nascimento Santos, Alex Domingos Reis, Adriano Abbud, Adriana Bugno                                    |
| EPI_ISL_14995579                                                                                                                                                                                                                                                                                                                                     | Secretaria Municipal de Saude de Feira de Santana                                           | Instituto Adolfo Lutz Strategic Laboratory                                                    | Claudio Tavares Sacchi, Karoline Rodrigues Campos, Ariadne Ferreira Amarante, Marlon Benedito Nascimento Santos, Alex Domingos Reis, Adriano Abbud, Adriana Bugno                                    |
| EPI_ISL_14995580                                                                                                                                                                                                                                                                                                                                     | UBS Alexander Fleming Simioni                                                               | Instituto Adolfo Lutz Strategic Laboratory                                                    | Claudio Tavares Sacchi, Karoline Rodrigues Campos, Ariadne Ferreira Amarante, Marlon Benedito Nascimento Santos, Alex Domingos Reis, Adriano Abbud, Adriana Bugno                                    |
| EPI_ISL_14995581                                                                                                                                                                                                                                                                                                                                     | Secretaria Municipal de Saude Sorocaba                                                      | Instituto Adolfo Lutz Strategic Laboratory                                                    | Claudio Tavares Sacchi, Karoline Rodrigues Campos, Ariadne Ferreira Amarante, Marlon Benedito Nascimento Santos, Alex Domingos Reis, Adriano Abbud, Adriana Bugno                                    |
| EPI_ISL_14995582                                                                                                                                                                                                                                                                                                                                     | Hosp. Municipa. Dr. Jose de Carvalho Florence                                               | Instituto Adolfo Lutz Strategic Laboratory                                                    | Claudio Tavares Sacchi, Karoline Rodrigues Campos, Ariadne Ferreira Amarante, Marlon Benedito Nascimento Santos, Alex Domingos Reis, Adriano Abbud, Adriana Bugno                                    |
| EPI_ISL_14995583                                                                                                                                                                                                                                                                                                                                     | UBS Agua Rasa                                                                               | Instituto Adolfo Lutz Strategic Laboratory                                                    | Claudio Tavares Sacchi, Karoline Rodrigues Campos, Ariadne Ferreira Amarante, Marlon Benedito Nascimento Santos, Alex Domingos Reis, Adriano Abbud, Adriana Bugno                                    |
| EPI_ISL_14995585                                                                                                                                                                                                                                                                                                                                     | Pronto Socorro Municipal do Promorar                                                        | Instituto Adolfo Lutz Strategic Laboratory                                                    | Claudio Tavares Sacchi, Karoline Rodrigues Campos, Ariadne Ferreira Amarante, Marlon Benedito Nascimento Santos, Alex Domingos Reis, Adriano Abbud, Adriana Bugno                                    |
| EPI_ISL_14995586                                                                                                                                                                                                                                                                                                                                     | UPA Centro                                                                                  | Instituto Adolfo Lutz Strategic Laboratory                                                    | Claudio Tavares Sacchi, Karoline Rodrigues Campos, Ariadne Ferreira Amarante, Marlon Benedito Nascimento Santos, Alex Domingos Reis, Adriano Abbud, Adriana Bugno                                    |
| EPI_ISL_14995587, EPI_ISL_14995588                                                                                                                                                                                                                                                                                                                   | Centro de Saude 24 horas                                                                    | Instituto Adolfo Lutz Strategic Laboratory                                                    | Claudio Tavares Sacchi, Karoline Rodrigues Campos, Ariadne Ferreira Amarante, Marlon Benedito Nascimento Santos, Alex Domingos Reis, Adriano Abbud, Adriana Bugno                                    |
| EPI_ISL_14995589                                                                                                                                                                                                                                                                                                                                     | Cresser Centro de Referencia da Saúde Sexual e Reprodutiva                                  | Instituto Adolfo Lutz Strategic Laboratory                                                    | Claudio Tavares Sacchi, Karoline Rodrigues Campos, Ariadne Ferreira Amarante, Marlon Benedito Nascimento Santos, Alex Domingos Reis, Adriano Abbud, Adriana Bugno                                    |
| EPI_ISL_14995590, EPI_ISL_14995591                                                                                                                                                                                                                                                                                                                   | Instituto de Infectologia Emilio Ribas                                                      | Instituto Adolfo Lutz Strategic Laboratory                                                    | Claudio Tavares Sacchi, Karoline Rodrigues Campos, Ariadne Ferreira Amarante, Marlon Benedito Nascimento Santos, Alex Domingos Reis, Adriano Abbud, Adriana Bugno                                    |
| EPI_ISL_14995592                                                                                                                                                                                                                                                                                                                                     | Unidade de Pronto Atendimento Cipo                                                          | Instituto Adolfo Lutz Strategic Laboratory                                                    | Claudio Tavares Sacchi, Karoline Rodrigues Campos, Ariadne Ferreira Amarante, Marlon Benedito Nascimento Santos, Alex Domingos Reis, Adriano Abbud, Adriana Bugno                                    |
| EPI_ISL_14995593                                                                                                                                                                                                                                                                                                                                     | SAE DST / Aids Ipiranga Jose Francisco Araujo                                               | Instituto Adolfo Lutz Strategic Laboratory                                                    | Claudio Tavares Sacchi, Karoline Rodrigues Campos, Ariadne Ferreira Amarante, Marlon Benedito Nascimento Santos, Alex Domingos Reis, Adriano Abbud, Adriana Bugno                                    |
| EPI_ISL_14995611                                                                                                                                                                                                                                                                                                                                     | UBS Horto Florestal                                                                         | Instituto Adolfo Lutz Strategic Laboratory                                                    | Claudio Tavares Sacchi, Karoline Rodrigues Campos, Ariadne Ferreira Amarante, Marlon Benedito Nascimento Santos, Alex Domingos Reis, Adriano Abbud, Adriana Bugno                                    |
| EPI_ISL_14995612                                                                                                                                                                                                                                                                                                                                     | Secretaria Mincipal de Saude de IRECE                                                       | Instituto Adolfo Lutz Strategic Laboratory                                                    | Claudio Tavares Sacchi, Karoline Rodrigues Campos, Ariadne Ferreira Amarante, Marlon Benedito Nascimento Santos, Alex Domingos Reis, Adriano Abbud, Adriana Bugno                                    |
| EPI_ISL_14995619                                                                                                                                                                                                                                                                                                                                     | Hosp. Tereza de Lisieux                                                                     | Instituto Adolfo Lutz Strategic Laboratory                                                    | Claudio Tavares Sacchi, Karoline Rodrigues Campos, Ariadne Ferreira Amarante, Marlon Benedito Nascimento Santos, Alex Domingos Reis, Adriano Abbud, Adriana Bugno                                    |
| EPI_ISL_14995622                                                                                                                                                                                                                                                                                                                                     | UBS Parque Meia Lua                                                                         | Instituto Adolfo Lutz Strategic Laboratory                                                    | Claudio Tavares Sacchi, Karoline Rodrigues Campos, Ariadne Ferreira Amarante, Marlon Benedito Nascimento Santos, Alex Domingos Reis, Adriano Abbud, Adriana Bugno                                    |
| EPI_ISL_14995631                                                                                                                                                                                                                                                                                                                                     | UPA Novo Horizonte                                                                          | Instituto Adolfo Lutz Strategic Laboratory                                                    | Claudio Tavares Sacchi, Karoline Rodrigues Campos, Ariadne Ferreira Amarante, Marlon Benedito Nascimento Santos, Alex Domingos Reis, Adriano Abbud, Adriana Bugno                                    |
| EPI_ISL_14995649                                                                                                                                                                                                                                                                                                                                     | Instituto de Infectologia Emilio Ribas                                                      | Instituto Adolfo Lutz Strategic Laboratory                                                    | Claudio Tavares Sacchi, Karoline Rodrigues Campos, Ariadne Ferreira Amarante, Marlon Benedito Nascimento Santos, Alex Domingos Reis, Adriano Abbud, Adriana Bugno                                    |
| EPI_ISL_14995652                                                                                                                                                                                                                                                                                                                                     | Hosp. Dr. Osiris Florindo Coelho Ferraz de Vasconcelos                                      | Instituto Adolfo Lutz Strategic Laboratory                                                    | Claudio Tavares Sacchi, Karoline Rodrigues Campos, Ariadne Ferreira Amarante, Marlon Benedito Nascimento Santos, Alex Domingos Reis, Adriano Abbud, Adriana Bugno                                    |
| EPI_ISL_14995653                                                                                                                                                                                                                                                                                                                                     | Unidade Basica de Saude Vila Cristina                                                       | Instituto Adolfo Lutz Strategic Laboratory                                                    | Claudio Tavares Sacchi, Karoline Rodrigues Campos, Ariadne Ferreira Amarante, Marlon Benedito Nascimento Santos, Alex Domingos Reis, Adriano Abbud, Adriana Bugno                                    |
| EPI_ISL_14995723                                                                                                                                                                                                                                                                                                                                     | Unidade Mista de Atendimento Infantil Carapicui                                             | Instituto Adolfo Lutz Strategic Laboratory                                                    | Claudio Tavares Sacchi, Karoline Rodrigues Campos, Ariadne Ferreira Amarante, Marlon Benedito Nascimento Santos, Alex Domingos Reis, Adriano Abbud, Adriana Bugno                                    |
| EPI_ISL_14995724                                                                                                                                                                                                                                                                                                                                     | Hosp. Carlos Chagas                                                                         | Instituto Adolfo Lutz Strategic Laboratory                                                    | Claudio Tavares Sacchi, Karoline Rodrigues Campos, Ariadne Ferreira Amarante, Marlon Benedito Nascimento Santos, Alex Domingos Reis, Adriano Abbud, Adriana Bugno                                    |
| EPI_ISL_15005641                                                                                                                                                                                                                                                                                                                                     | Chongqing Municipal Center for Disease Control and Prevention                               | Chongqing Municipal Center for Disease Control and Prevention                                 | Sheng Ye, Yun Tang, Shuang Chen, Mingyue Wang, Zhangping Tan, Zhen Yu                                                                                                                                |
| EPI_ISL_15014548                                                                                                                                                                                                                                                                                                                                     | Instituto Nacional de Higiene Rafael Rangel                                                 | Laboratorio de Virologia Molecular, CMBC, Instituto Venezolano de Investigaciones Cientificas | Pierina D'Angelo, Carmen L Loureiro, Rossana C Jaspe, Yoneira Sulbaran, Lieska Rodríguez, Víctor Alarcón, José Manuel García, José Luis Zambrano, Ferdinando Liprandi, Héctor R Rangel, Flor H Pujol |
| EPI_ISL_15016099, EPI_ISL_15016101                                                                                                                                                                                                                                                                                                                   | Florida Bureau of Public Health Laboratories                                                | Florida Bureau of Public Health Laboratories                                                  | Sarah Schmedes, Brenna McGruder, George Churchwell, Maria Pedrosa, Phil A. Lee                                                                                                                       |
| EPI_ISL_15023213, EPI_ISL_15023214                                                                                                                                                                                                                                                                                                                   | Laboratorio Departamental de Salud Publica de Antioquia                                     | Laboratorio Departamental de Salud Publica de Antioquia                                       | Betancur,I.I.B., Velarde-Hoyos,C.-A.C.V., Gomez,R.R.G. and Mercado-Reyes,M.M.R.                                                                                                                      |
| EPI_ISL_15055820                                                                                                                                                                                                                                                                                                                                     | Sicilian Regional Laboratory - AOUP "P. Giaccone" - University of Palermo                   | Sicilian Regional Laboratory - AOUP "P. Giaccone" - University of Palermo                     | Fabio Tramuto, Carmelo Massimo Maida, Giulia Randazzo, Valeria Guzzetta, Walter Mazzucco, Giorgio Graziano, Vincenzo Restivo, Claudio Costantino, Francesco Vitale                                   |
| EPI_ISL_15076130, EPI_ISL_15076131                                                                                                                                                                                                                                                                                                                   | Environmental, Agricultural, and Occupational Health, University of Nebraska Medical Center | Environmental, Agricultural, and Occupational Health, University of Nebraska Medical Center   | Chapman,R.C., Bernhard,K., McCutchen,E.L., Fauver,J.R., O'Dell,J.X., Mannell,M., Wiley,M.R. and Cross,S.T.                                                                                           |
| EPI_ISL_15076172                                                                                                                                                                                                                                                                                                                                     | Antioquia, Laboratorio Departamental de Salud Publica de Antioquia                          | Antioquia, Laboratorio Departamental de Salud Publica de Antioquia                            | Betancur,I.I.B., Velarde-Hoyos,C.-A.C.V., Gomez,R.R.G. and Mercado-Reyes,M.M.R                                                                                                                       |
| EPI_ISL_15076180, EPI_ISL_15076181, EPI_ISL_15076182, EPI_ISL_15076183, EPI_ISL_15076184, EPI_ISL_15076185, EPI_ISL_15076186, EPI_ISL_15076187, EPI_ISL_15076188, EPI_ISL_15076189, EPI_ISL_15076191, EPI_ISL_15076192, EPI_ISL_15076193, EPI_ISL_15076194, EPI_ISL_15076195, EPI_ISL_15076196, EPI_ISL_15076197, EPI_ISL_15076198                   | see above                                                                                   | Department of Genetics, University of North Carolina at Chapel Hill                           | Deanhardt,B., Miller,M. and Wang,J.R.                                                                                                                                                                |
| EPI_ISL_15104903                                                                                                                                                                                                                                                                                                                                     | Institute for Virology, Philipps-University Marburg                                         | Institute for Virology, Philipps-University Marburg                                           | Eickmann, M., Lier, C., Kowalski, K., Kraft, F., Becker, S.                                                                                                                                          |
| EPI_ISL_15120448, EPI_ISL_15120449, EPI_ISL_15120452, EPI_ISL_15120454, EPI_ISL_15120460, EPI_ISL_15120461, EPI_ISL_15120464, EPI_ISL_15120470, EPI_ISL_15120472, EPI_ISL_15120473, EPI_ISL_15120474, EPI_ISL_15120475, EPI_ISL_15120476, EPI_ISL_15120479, EPI_ISL_15120480, EPI_ISL_15120481, EPI_ISL_15120493, EPI_ISL_15120495, EPI_ISL_15120496 | see above                                                                                   | Los Angeles County Public Health Laboratories                                                 | P. Hemarajata et al.                                                                                                                                                                                 |



EPI\_ISL\_15158315, EPI\_ISL\_15158316, EPI\_ISL\_15158317, EPI\_ISL\_15158318, EPI\_ISL\_15158319, EPI\_ISL\_15158320, EPI\_ISL\_15158321, EPI\_ISL\_15158322, EPI\_ISL\_15158324, EPI\_ISL\_15158325, EPI\_ISL\_15158326, EPI\_ISL\_15158327, EPI\_ISL\_15158328, EPI\_ISL\_15158329, EPI\_ISL\_15158330, EPI\_ISL\_15158331, EPI\_ISL\_15158332, EPI\_ISL\_15158333, EPI\_ISL\_15158334, EPI\_ISL\_15158335, EPI\_ISL\_15158336, EPI\_ISL\_15158337, EPI\_ISL\_15158340, EPI\_ISL\_15158341, EPI\_ISL\_15158344, EPI\_ISL\_15158346, EPI\_ISL\_15158347, EPI\_ISL\_15158348, EPI\_ISL\_15158349, EPI\_ISL\_15158350, EPI\_ISL\_15158354, EPI\_ISL\_15158358, EPI\_ISL\_15158360, EPI\_ISL\_15158361, EPI\_ISL\_15158363, EPI\_ISL\_15158364, EPI\_ISL\_15158366, EPI\_ISL\_15158367, EPI\_ISL\_15158368, EPI\_ISL\_15158369, EPI\_ISL\_15158370, EPI\_ISL\_15158371, EPI\_ISL\_15158372, EPI\_ISL\_15158373, EPI\_ISL\_15158374, EPI\_ISL\_15158376, EPI\_ISL\_15158377, EPI\_ISL\_15158378, EPI\_ISL\_15158379, EPI\_ISL\_15158380, EPI\_ISL\_15158381, EPI\_ISL\_15158384, EPI\_ISL\_15158385, EPI\_ISL\_15158386, EPI\_ISL\_15158387, EPI\_ISL\_15158388, EPI\_ISL\_15158389, EPI\_ISL\_15158390, EPI\_ISL\_15158391, EPI\_ISL\_15158393, EPI\_ISL\_15158394, EPI\_ISL\_15158395, EPI\_ISL\_15158398

|           |                                                                                 |                                                                                 |             |
|-----------|---------------------------------------------------------------------------------|---------------------------------------------------------------------------------|-------------|
| see above | Molecular Biology, Microbiology, and Biochemistry, Southern Illinois University | Molecular Biology, Microbiology, and Biochemistry, Southern Illinois University | Gagnon,K.T. |
|-----------|---------------------------------------------------------------------------------|---------------------------------------------------------------------------------|-------------|

EPI\_ISL\_15165602, EPI\_ISL\_15165603, EPI\_ISL\_15165604, EPI\_ISL\_15165605, EPI\_ISL\_15165606, EPI\_ISL\_15165607, EPI\_ISL\_15165608, EPI\_ISL\_15165609, EPI\_ISL\_15165610, EPI\_ISL\_15165611, EPI\_ISL\_15165612, EPI\_ISL\_15165613, EPI\_ISL\_15165614, EPI\_ISL\_15165615, EPI\_ISL\_15165616, EPI\_ISL\_15165617, EPI\_ISL\_15165618

|           |                                                                                                                                                   |                                                                                                                                                   |                                                                                                                                                                    |
|-----------|---------------------------------------------------------------------------------------------------------------------------------------------------|---------------------------------------------------------------------------------------------------------------------------------------------------|--------------------------------------------------------------------------------------------------------------------------------------------------------------------|
| see above | Centro de Desenvolvimento Científico e Tecnológico (CDCT), Centro Estadual de Vigilância em Saúde (CEVS) da Secretaria Estadual da Saúde (SES-RS) | Centro de Desenvolvimento Científico e Tecnológico (CDCT), Centro Estadual de Vigilância em Saúde (CEVS) da Secretaria Estadual da Saúde (SES-RS) | Richard Steiner Salvato, Fernanda Marques Godinho, Regina Bones Barcellos, Patrícia Sesterheim, Amanda Pellenz Ruivo, Viviane Horn de Melo, Júlio Augusto Schroder |
|-----------|---------------------------------------------------------------------------------------------------------------------------------------------------|---------------------------------------------------------------------------------------------------------------------------------------------------|--------------------------------------------------------------------------------------------------------------------------------------------------------------------|

EPI\_ISL\_15199625, EPI\_ISL\_15199626, EPI\_ISL\_15199627, EPI\_ISL\_15199628, EPI\_ISL\_15199630, EPI\_ISL\_15199631, EPI\_ISL\_15199632, EPI\_ISL\_15199633, EPI\_ISL\_15199634, EPI\_ISL\_15199636, EPI\_ISL\_15199637, EPI\_ISL\_15199638, EPI\_ISL\_15199639, EPI\_ISL\_15199641, EPI\_ISL\_15199645, EPI\_ISL\_15199646, EPI\_ISL\_15199649, EPI\_ISL\_15199650, EPI\_ISL\_15199651, EPI\_ISL\_15199652, EPI\_ISL\_15199653, EPI\_ISL\_15199654, EPI\_ISL\_15199656, EPI\_ISL\_15199659, EPI\_ISL\_15199661, EPI\_ISL\_15199662, EPI\_ISL\_15199663, EPI\_ISL\_15199665, EPI\_ISL\_15199668, EPI\_ISL\_15199669, EPI\_ISL\_15199670, EPI\_ISL\_15199671, EPI\_ISL\_15199672, EPI\_ISL\_15199673, EPI\_ISL\_15199674, EPI\_ISL\_15199676, EPI\_ISL\_15199677, EPI\_ISL\_15199678, EPI\_ISL\_15199679, EPI\_ISL\_15199680, EPI\_ISL\_15199681, EPI\_ISL\_15199682, EPI\_ISL\_15199683, EPI\_ISL\_15199684, EPI\_ISL\_15199685, EPI\_ISL\_15199687, EPI\_ISL\_15199688, EPI\_ISL\_15199689, EPI\_ISL\_15199690, EPI\_ISL\_15199691, EPI\_ISL\_15199693, EPI\_ISL\_15199694, EPI\_ISL\_15199696, EPI\_ISL\_15199697, EPI\_ISL\_15199698, EPI\_ISL\_15199699, EPI\_ISL\_15199700, EPI\_ISL\_15199702, EPI\_ISL\_15199703, EPI\_ISL\_15199704, EPI\_ISL\_15199705, EPI\_ISL\_15199706, EPI\_ISL\_15199708, EPI\_ISL\_15199709, EPI\_ISL\_15199714, EPI\_ISL\_15199715, EPI\_ISL\_15199716, EPI\_ISL\_15199717, EPI\_ISL\_15199718, EPI\_ISL\_15199719, EPI\_ISL\_15199721, EPI\_ISL\_15199724, EPI\_ISL\_15199725, EPI\_ISL\_15199726, EPI\_ISL\_15199727, EPI\_ISL\_15199728, EPI\_ISL\_15199729, EPI\_ISL\_15199730, EPI\_ISL\_15199731, EPI\_ISL\_15199732, EPI\_ISL\_15199733, EPI\_ISL\_15199734, EPI\_ISL\_15199735, EPI\_ISL\_15199736, EPI\_ISL\_15199737, EPI\_ISL\_15199738, EPI\_ISL\_15199739, EPI\_ISL\_15199740, EPI\_ISL\_15199742, EPI\_ISL\_15199743, EPI\_ISL\_15199744, EPI\_ISL\_15199747, EPI\_ISL\_15199749, EPI\_ISL\_15199750, EPI\_ISL\_15199751, EPI\_ISL\_15199752, EPI\_ISL\_15199753, EPI\_ISL\_15199754, EPI\_ISL\_15199756, EPI\_ISL\_15199757, EPI\_ISL\_15199760, EPI\_ISL\_15199761, EPI\_ISL\_15199762, EPI\_ISL\_15199764, EPI\_ISL\_15199765, EPI\_ISL\_15199767, EPI\_ISL\_15199768, EPI\_ISL\_15199769, EPI\_ISL\_15199770, EPI\_ISL\_15199771, EPI\_ISL\_15199772, EPI\_ISL\_15199773, EPI\_ISL\_15199774, EPI\_ISL\_15199776, EPI\_ISL\_15199777, EPI\_ISL\_15199778, EPI\_ISL\_15199779, EPI\_ISL\_15199780, EPI\_ISL\_15199781, EPI\_ISL\_15199782, EPI\_ISL\_15199783, EPI\_ISL\_15199784, EPI\_ISL\_15199786, EPI\_ISL\_15199787, EPI\_ISL\_15199788, EPI\_ISL\_15199789, EPI\_ISL\_15199790, EPI\_ISL\_15199791, EPI\_ISL\_15199793, EPI\_ISL\_15199794, EPI\_ISL\_15199795, EPI\_ISL\_15199796, EPI\_ISL\_15199797, EPI\_ISL\_15199798, EPI\_ISL\_15199799, EPI\_ISL\_15199830, EPI\_ISL\_15199855, EPI\_ISL\_15199856, EPI\_ISL\_15199857, EPI\_ISL\_15199858, EPI\_ISL\_15199861, EPI\_ISL\_15199865, EPI\_ISL\_15199867, EPI\_ISL\_15199872, EPI\_ISL\_15199873, EPI\_ISL\_15199874

|           |                                                                                                       |                                                                                                       |                                                                                                                                                                                                                |
|-----------|-------------------------------------------------------------------------------------------------------|-------------------------------------------------------------------------------------------------------|----------------------------------------------------------------------------------------------------------------------------------------------------------------------------------------------------------------|
| see above | Department of Infectious Diseases, National Institute of Health Doutor Ricardo Jorge, Portugal (INSA) | Department of Infectious Diseases, National Institute of Health Doutor Ricardo Jorge, Portugal (INSA) | Isidro,J., Borges,V., Pinto,M., Sobral,D., Santos,J., Nunes,A., Mixao,V., Ferreira,R., Santos,D., Duarte,S., Vieira,L., Borrego,M.J., Nuncio,S., Lopes de Carvalho,I., Pelerito,A., Cordeiro,R. and Gomes,J.P. |
|-----------|-------------------------------------------------------------------------------------------------------|-------------------------------------------------------------------------------------------------------|----------------------------------------------------------------------------------------------------------------------------------------------------------------------------------------------------------------|
